# Supplementary material for: Immobilization of Amano lipase from Pseudomonas fluorescens on silk fibroin spheres: an alternative protocol for the enantioselective synthesis of halohydrins
Source: Royal Society of Chemistry journal article supplement (doi:10.1039/c7ra00083a), 2017-01-01
Supplement: c7ra00083a1.pdf [file c7ra00083a1.pdf]

## Supplementary Information

### **Immobilization of *Pseudomonas fluorescens* lipase on silk fibroin spheres: An alternative protocol for the enantioselective synthesis of halohydrins**

**Irlon M. Ferreira,<sup>a,b</sup> Sergio A. Yoshioka,<sup>c</sup> João V. Comasseto<sup>d,e</sup> and  
André L. M. Porto<sup>a,\*</sup>**

<sup>a</sup>*Laboratório de Química Orgânica e Biocatálise, Instituto de Química de São Carlos, Universidade de São Paulo, Av. João Dagnone, Ed. Química Ambiental, J. Santa Angelina, 1100, 13563-120 São Carlos, São Paulo, Brazil. E-mail: almporto@iqsc.usp.br.*

<sup>b</sup>*Universidade Federal do Amapá, Grupo de Biocatálise e Biotransformação em Química Orgânica, Rod. Juscelino Kubitscheck, KM 02, S/N – J. Marco Zero, 68903-419, Macapá, AP, Brazil.*

<sup>c</sup>*Laboratório de Bioquímica e Biomateriais, Instituto de Química de São Carlos, Universidade de São Paulo, Av. Trabalhador São-Carlense, 400, 13560-970 São Carlos, SP, Brazil.*

<sup>d</sup>*Instituto de Química, Universidade de São Paulo, Av. Professor Lineu Prestes 748, 05508-000 São Paulo, SP, Brazil.*

<sup>e</sup>*Instituto de Ciências Ambientais, Químicas e Farmacêuticas, Universidade Federal de São Paulo, Av. Prof. Artur Riedel, 275, 09972-270 Diadema, SP, Brazil.*

## Table of contents

|                                                                                                                       |        |
|-----------------------------------------------------------------------------------------------------------------------|--------|
| 1. Optical rotations of the products obtained from of <i>P. fluorescens</i> lipase on silk fibroin spheres.....       | S1     |
| 2. Thermogravimetric curves of samples: (--) Silk fibroin sphere; (–) Immobilized lipase on silk fibroin sphere ..... | S2     |
| 3. <sup>1</sup> H, <sup>13</sup> C NMR and Mass Spectral data.....                                                    | S5-S8  |
| 4. Copies of <sup>1</sup> H and <sup>13</sup> C NMR Spectra .....                                                     | S9-S20 |
| 4. GC-FID Chromatograms.....                                                                                          | S9-S20 |
| 5. References.....                                                                                                    | S44    |

**Optical rotations of the products obtained from of *P. fluorescens* lipase on silk fibroin spheres.**

| Compounds     | $[\alpha]_D^T$                                                    | $[\alpha]_D^T$                                                     |
|---------------|-------------------------------------------------------------------|--------------------------------------------------------------------|
|               | Experimental                                                      | Literature                                                         |
| <b>(R)-1a</b> | $[\alpha]_D^{26} - 39.2$ (c 1.0, CHCl <sub>3</sub> ) <sup>a</sup> | $[\alpha]_D^{20} - 45.1$ (c 1.0, CHCl <sub>3</sub> ) <sup>1</sup>  |
| <b>(R)-1b</b> | $[\alpha]_D^{26} - 16.2$ (c 0.8, CHCl <sub>3</sub> ) <sup>a</sup> | $[\alpha]_D^{20} - 39.5$ (c 0.5, CHCl <sub>3</sub> ) <sup>2</sup>  |
| <b>(R)-1c</b> | $[\alpha]_D^{26} - 10.8$ (c 1.0, CHCl <sub>3</sub> ) <sup>a</sup> | $[\alpha]_D^{20} - 31.8$ (c 2.85, CHCl <sub>3</sub> ) <sup>3</sup> |
| <b>(R)-1d</b> | $[\alpha]_D^{26} - 31.2$ (c 1.1, CHCl <sub>3</sub> ) <sup>a</sup> | $[\alpha]_D^{20} - 59.5$ (c 1.0, CHCl <sub>3</sub> ) <sup>1</sup>  |
| <b>(S)-2a</b> | $[\alpha]_D^{26} + 82.4$ (c 1.5, CHCl <sub>3</sub> ) <sup>a</sup> | $[\alpha]_D^{20} + 77.7$ (c 1.0, EtOAc) <sup>4</sup>               |
| <b>(S)-2b</b> | $[\alpha]_D^{26} + 30.4$ (c 0.5, CHCl <sub>3</sub> ) <sup>a</sup> | -                                                                  |
| <b>(S)-2c</b> | $[\alpha]_D^{26} + 26.7$ (c 2, CHCl <sub>3</sub> ) <sup>a</sup>   | $[\alpha]_D^{25} + 56.6$ (c 3.4, CHCl <sub>3</sub> ) <sup>3</sup>  |
| <b>(S)-2d</b> | $[\alpha]_D^{26} + 44.7$ (c 1.0, CHCl <sub>3</sub> ) <sup>a</sup> | $[\alpha]_D^{25} + 38.6$ (c 1.15, CHCl <sub>3</sub> ) <sup>5</sup> |
| <b>(S)-3a</b> | $[\alpha]_D^{26} + 13.6$ (c 0.4, CHCl <sub>3</sub> ) <sup>a</sup> | $[\alpha]_D^{24} + 25.1$ (c 1.0, CHCl <sub>3</sub> ) <sup>6</sup>  |
| <b>(S)-3b</b> | $[\alpha]_D^{26} + 11.8$ (c 0.6, CHCl <sub>3</sub> ) <sup>a</sup> | $[\alpha]_D^{24} + 14.6$ (c 1.0, CHCl <sub>3</sub> ) <sup>6</sup>  |
| <b>(S)-3c</b> | $[\alpha]_D^{25} + 10.3$ (c 0.6, CHCl <sub>3</sub> ) <sup>a</sup> | $[\alpha]_D^{24} + 24.9$ (c 1.0, CHCl <sub>3</sub> ) <sup>6</sup>  |
| <b>(S)-4</b>  | $[\alpha]_D^{25} + 2.5$ (c 0.4, CHCl <sub>3</sub> ) <sup>b</sup>  | -                                                                  |

<sup>a</sup>The optical rotation was measured in CHCl<sub>3</sub> on a Perkin-Elmer 241 polarimeter equipped with a lamp Na-589nm. <sup>b</sup>The optical rotation was measured on a JASCO in CHCl<sub>3</sub> P2000 polarimeter equipped with a 589nm-lamp Na.

**Thermogravimetric curves of samples: (--) Silk fibroin sphere; (—) Immobilized lipase on silk fibroin sphere.**

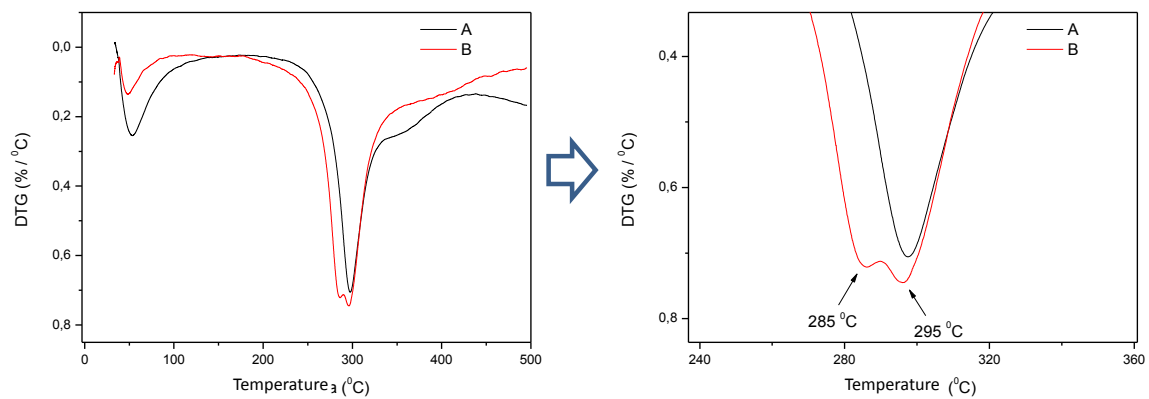

**2-chloro-1-phenylethanol (1a):**

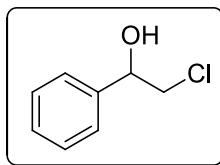

$C_8H_9ClO$ ,  $156.03 \text{ g.mol}^{-1}$ . Yellow oil;  $^1H$  NMR (400 MHz,  $CDCl_3$  ppm)  $\delta$ : 3.71 (dd,  $J = 11.7$  and  $4.6$  Hz, 1H), 3.78 (dd,  $J = 11.7$  and  $8.0$  Hz, 1H), 5.95 (dd,  $J = 8.0$  and  $4.6$  Hz, 1H), 7.37 – 7.32 (m, 5H);  $^{13}C$  NMR (100 MHz,  $CDCl_3$ )  $\delta$  (ppm): 50.9, 74, 126, 128.4, 128.6, 139.9; MS (EI, 70 eV)  $m/z$  (%): 156 (11), 107 (100), 79 (77), 51 (17); IR  $\nu_{max}$  ( $cm^{-1}$ ): 3404, 2956, 1494, 1064, 725.

**2-bromo-1-phenylethanol (1b):**

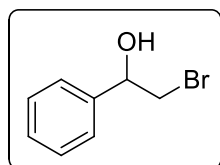

$C_8H_9BrO$ ,  $199.98 \text{ g.mol}^{-1}$ . Yellow oil;  $^1H$  NMR (400 MHz,  $CDCl_3$  ppm)  $\delta$ : 1.57 (s, 1H), 3.48 (dd,  $J = 10.5$  and  $8.8$  Hz, 1H), 3.60 (dd,  $J = 10.5$  and  $3.4$  Hz, 1H), 4.89 (dd,  $J = 8.8$  and  $3.2$  Hz, 1H), 7.25-7.46 (m, 5H);  $^{13}C$  NMR (100 MHz,  $CDCl_3$  ppm)  $\delta$ : 39.9, 73.1, 127.3, 128.8, 134.2, 138.7; MS (EI, 70 eV)  $m/z$  (%): 200 (4), 107 (100), 79 (28), 51 (12); IR  $\nu_{max}$  ( $cm^{-1}$ ): 3398, 2954, 2926, 1429, 1454, 1377, 1068, 759.

**2-bromo-1-(4-bromophenyl)ethanol (1c):**

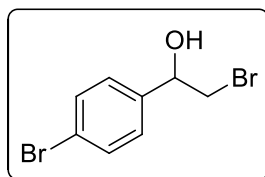

$C_8H_8Br_2O$ ,  $277.9 \text{ g.mol}^{-1}$ . White solid, m.p.:  $59 \text{ }^\circ C$  (lit.<sup>7</sup> 69-71);  $^1H$  NMR (400 MHz,  $CDCl_3$  ppm)  $\delta$ : 3.49 (dd,  $J = 10.8$  Hz, 1H), 3.61 (dd,  $J = 10.5$ , 4 Hz, 1H), 4.91 (m, 1H), 7.27 (d,  $J = 8$  Hz), 7.51 (d,  $J = 8$  Hz);  $^{13}C$  NMR (100 MHz,  $CDCl_3$  ppm)  $\delta$ : 39.9, 73, 122.3, 127.6, 131.7, 139.2; MS (EI, 70 eV)  $m/z$  (%): 280 (8), 185 (100), 157 (23), 77 (75), 51 (20); IR  $\nu_{max}$  ( $cm^{-1}$ ): 3398, 2954, 2926, 1492, 1454, 1068, 759, 700.

**2-bromo-1-(4-chlorophenyl)ethanol (1d):**

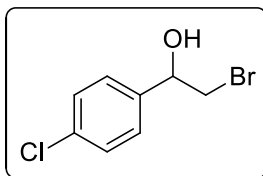

$C_8H_8BrClO$ ,  $235.51 \text{ g}\cdot\text{mol}^{-1}$ . White solid, m.p.:  $59 \text{ }^\circ\text{C}$  (lit.<sup>8</sup>  $61\text{-}62 \text{ }^\circ\text{C}$ );  $^1\text{H}$  NMR (400 MHz,  $\text{CDCl}_3$  ppm)  $\delta$ : 3.50 (dd,  $J = 10.4$  and  $8.8$  Hz, 1H), 3.61 (dd,  $J = 10.5$  and  $3.4$  Hz, 1H), 4.91 (dt,  $J = 8.6$  and  $3.1$ , 1H), 7.28–7.39 (m, 4H);  $^{13}\text{C}$  NMR (100 MHz,  $\text{CDCl}_3$  ppm)  $\delta$ : 138.7, 128.8, 127.3, 126.8, 73.0, 39.9; MS (EI, 70 eV)  $m/z$  (%): 236 (6), 141 (100), 113 (20), 77 (54), 51 (8); IR  $\nu_{\text{max}}$  ( $\text{cm}^{-1}$ ): 3390, 2960, 2865, 1597, 1429, 1091, 833, 727, 702.

**2-chloro-1-phenylethyl acetate (2a):**

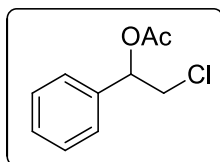

$C_{10}H_{11}ClO_2$ ,  $198.04 \text{ g}\cdot\text{mol}^{-1}$ . White solid, m.p.:  $47 \text{ }^\circ\text{C}$ ;  $^1\text{H}$  NMR (500 MHz,  $\text{CDCl}_3$  ppm)  $\delta$ : 3,71 (dd,  $J = 11,7$  and  $4,6$  Hz, 1 H), 3,78 (dd,  $J = 11,7$  and  $8$  Hz, 1 H), 5,95 (dd,  $J = 8,4$  and  $4,9$  Hz, 1 H), 7,48 - 7,30 (m, 5 H) ppm;  $^{13}\text{C}$  NMR (125 MHz,  $\text{CDCl}_3$  ppm)  $\delta$ : 20,98, 46,50, 75,0, 126,6, 128,7, 128,8, 137,1, 169,8; MS (EI, 70 eV)  $m/z$  (%): 198 (3), 162 (15), 102 (12), 77 (23), 43 (100); IR  $\nu_{\text{max}}$  ( $\text{cm}^{-1}$ ): 2960, 2929, 1747, 1373, 1230, 1024, 761, 689.

**2-bromo-1-phenylethyl acetate (2b):**

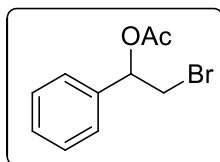

$C_{10}H_{11}BrO_2$ ,  $241.99 \text{ g}\cdot\text{mol}^{-1}$ . Colorless oil;  $^1\text{H}$  NMR (500 MHz,  $\text{CDCl}_3$  ppm)  $\delta$ : 7.40 – 7.28 (m, 1H), 5.05 (dd,  $J = 7.5$  and  $6.2$  Hz, 1H), 4.46 – 4.39 (m, 2H), 2.05 (s, 3H);  $^{13}\text{C}$  NMR (125 MHz,  $\text{CDCl}_3$ )  $\delta$  (ppm): 169.7, 136.6, 131.9, 128.3, 122.9, 74.1, 33.7, 20.9; MS (EI, 70 eV)  $m/z$  (%): 242 (8), 198 (16), 141 (32), 103 (36), 77 (78), 40 (100); IR  $\nu_{\text{max}}$  ( $\text{cm}^{-1}$ ): 2964, 1745, 1489, 1236, 758.

**2-bromo-1-(4-bromophenyl)ethyl acetate (2c):**

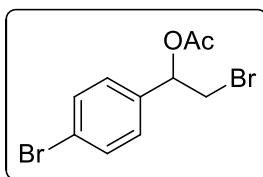

$C_{10}H_{10}Br_2O_2$ , 322.00  $g \cdot mol^{-1}$ . Colorless oil;  $^1H$  NMR (400 MHz,  $CDCl_3$ )  $\delta$  (ppm): 7.49 (d,  $J = 8.5$  Hz, 2H), 7.25 – 7.21 (m, 2H), 5.90 (dd,  $J = 7.6$  and 5.1 Hz, 1H), 3.60 (dd,  $J = 10.8$  and 7.7 Hz, 1H), 3.54 (dd,  $J = 10.8$  and 5.1 Hz, 1H), 2.12 (s, 3H);  $^{13}C$  NMR (100 MHz,  $CDCl_3$ )  $\delta$  (ppm): 169.7, 136.6, 131.9, 128.3, 122.9, 74.1, 33.7, 20.9; MS (EI, 70 eV)  $m/z$  (%): 322 (0.3), 242 (15), 200 (31), 183 (26), 157 (6), 102 (21), 77 (23), 43 (100); IR  $\nu_{max}$  ( $cm^{-1}$ ): 2962, 2926, 1745, 1489, 1371, 1236, 1070, 1012, 821, 723.

**2-bromo-1-(4-chlorophenyl)ethyl acetate (2d):**

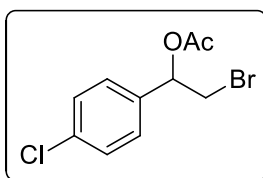

$C_{10}H_{10}BrClO_2$ , 277.94  $g \cdot mol^{-1}$ . Colorless oil;  $^1H$  NMR (500 MHz,  $CDCl_3$  ppm)  $\delta$ : 7.34 (d,  $J = 8.6$  Hz, 2H), 7.28 (d,  $J = 8.6$  Hz, 2H), 5.92 (dd,  $J = 7.7$  and 5.0 Hz, 1H), 3.60 (dd,  $J = 10.8$  and 7.7 Hz, 1H), 3.54 (dd,  $J = 10.8$  and 5.0 Hz, 1H), 2.12 (d,  $J = 2.4$  Hz, 3H);  $^{13}C$  NMR (125 MHz,  $CDCl_3$  ppm)  $\delta$ : 169.66, 136.12, 134.70, 128.90, 128.00, 126.54, 74.07, 33.83, 20.89; MS (IE, 70 eV)  $m/z$  (%): 278 (0.15), 196 (20), 154 (45), 137 (40), 103 (14), 77 (17), 43 (100); IR  $\nu_{max}$  ( $cm^{-1}$ ): 3032, 2964, 1745, 1492, 1373, 1238, 1091, 827.

**2-phenyloxirane (3a):**

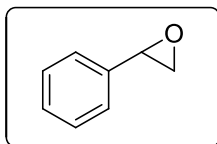

$C_8H_8O$ , 120.06  $g \cdot mol^{-1}$ . Colorless oil; NMR  $^1H$  (400 MHz,  $CDCl_3$  ppm)  $\delta$ : 2.82 (dd,  $J = 5.5$  and 2.6 Hz, 1H), 3.17 (dd,  $J = 5.5$  and 4.1 Hz, 1H), 3.88 (dd,  $J = 4.0$  and 2.6 Hz, 1H), 7.55 – 7.13 (m, 5H);  $^{13}C$  NMR (100 MHz,  $CDCl_3$ )  $\delta$  (ppm): 137.6 (s), 128.5, 128.1, 125.5, 52.3, 51.1; MS (EI, 70 eV)  $m/z$  (%): 120 (43), 119 (67), 91 (100), 77 (10), 51 (20); IR  $\nu_{max}$  ( $cm^{-1}$ ): 2913, 1495, 1453, 876, 760.

**2-(4-bromophenyl)oxirane (3b):**

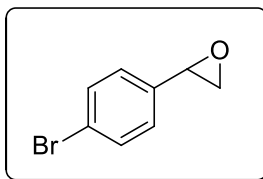

$C_8H_7BrO$ , 197.07  $g \cdot mol^{-1}$ . Colorless oil;  $^1H$  NMR (400 MHz,  $CDCl_3$ )  $\delta$  (ppm): 2.75 (dd,  $J = 5.4$  and  $2.5$  Hz, 1H); 3.14 (dd,  $J = 5.3$  and  $4.2$  Hz, 1H), 3.84 – 3.81 (m, 1H), 7.15 (d,  $J = 8.4$  Hz, 2H), 7.47 (d,  $J = 8.4$  Hz, 2H);  $^{13}C$  NMR (100 MHz,  $CDCl_3$ )  $\delta$  (ppm): 51.2, 58.8, 122, 127, 131, 137; MS (EI, 70 eV)  $m/z$  (%): 198 (13), 169 (20), 119 (55), 89 (100), 77 (7), 63 (32); IR  $\nu_{max}$  ( $cm^{-1}$ ): 2958, 1745, 1517, 1230, 1026.

**2-(4-chlorophenyl)oxirane (3c):**

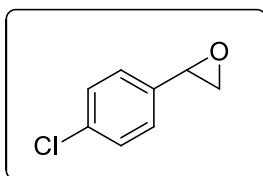

$C_8H_7ClO$ , 154.07  $g \cdot mol^{-1}$ . Colorless oil.  $^1H$  NMR (400 MHz,  $CDCl_3$ )  $\delta$  (ppm): 7.30 (d,  $J = 8.5$  Hz, 2H), 7.19 (d,  $J = 8.5$  Hz, 2H), 3.82 (dd,  $J = 3.7$  and  $2.8$  Hz, 1H), 3.13 (dd,  $J = 5.4$  and  $4.1$  Hz, 1H), 2.73 (dd,  $J = 5.4$  and  $2.5$  Hz, 1H) ppm;  $^{13}C$  NMR (100 MHz,  $CDCl_3$ )  $\delta$  (ppm): 136.1, 133.9, 128.7, 126.8, 51.7, 51.2 ppm; MS (EI, 70 eV)  $m/z$  (%): 154 (23), 119 (69), 89 (100), 63 (20); IR  $\nu_{max}$  ( $cm^{-1}$ ): 2927, 2854, 1215, 759.

**(S)-1-(4-chlorophenyl)-2-(1H-1,2,3-triazol-1-yl)ethanol (4):**

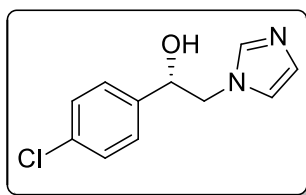

$C_{11}H_{11}ClN_2O$ , 222.06  $g \cdot mol^{-1}$ . White solid, m.p.: 185-186 °C (lit.<sup>8</sup> 160-164);  $^1H$  NMR (400 MHz,  $CD_3OD$ )  $\delta$  (ppm): 4.14 (dd,  $J = 14.1$  and  $6.9$  Hz, 1H), 4.21 (dd,  $J = 14.1$  and  $4.4$  Hz, 1H), 7.46 (s, 1H), 4.91 (dd,  $J = 6.9$  and  $4.5$  Hz, 1H), 7.03 (t,  $J = 1.3$  Hz, 1H), 6.88 (s, 1H), 7.34-7.22 (m, 4H);  $^{13}C$  NMR (100 MHz,  $CD_3OD$ )  $\delta$  (ppm): 141.8, 139, 134.5, 129.4, 128.7, 128.4, 121.5, 73.4, 55; MS (EI, 70 eV)  $m/z$  (%): 222 (5), 141 (19), 113 (13), 82 (100), 77 (40), 51 (7); IR  $\nu_{max}$  ( $cm^{-1}$ ) = 3116, 2929, 2856, 1514, 1408, 1072, 748, 661.



$^1\text{H}$  NMR (500 MHz,  $\text{CDCl}_3$ ) of 2-chloro-1-phenylethanol (**1a**)

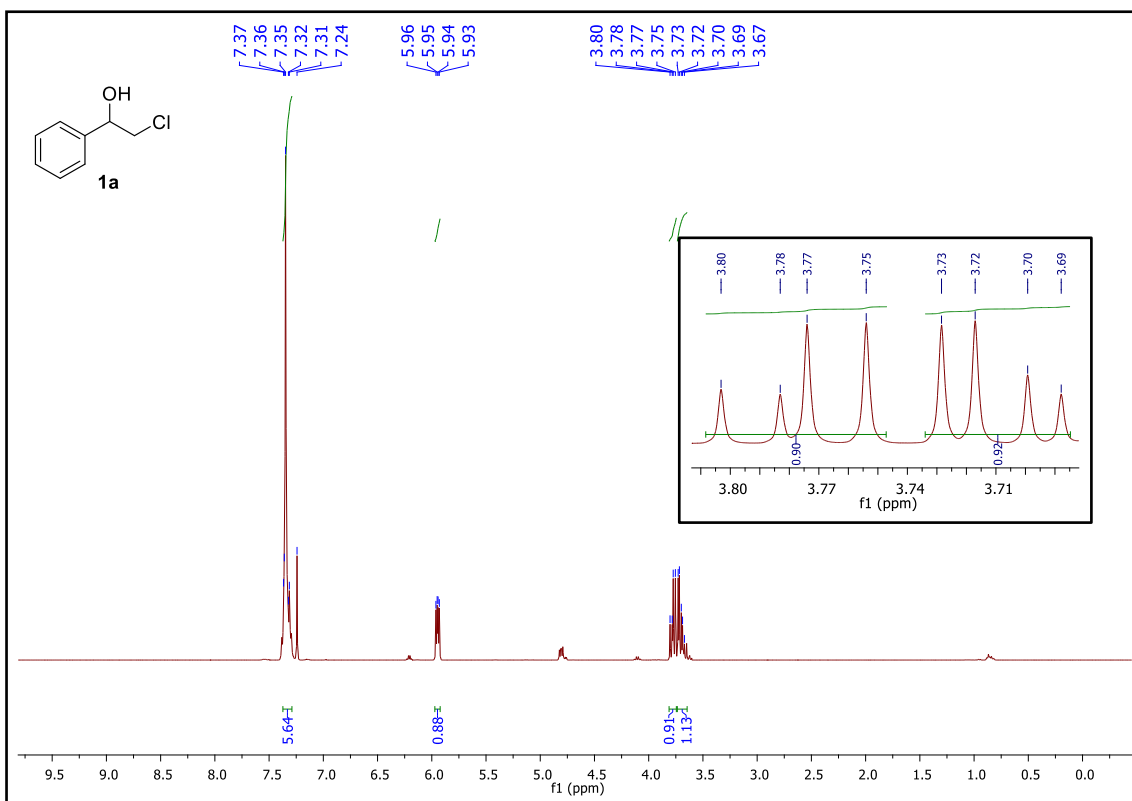

$^{13}\text{C}$  NMR (125 MHz,  $\text{CDCl}_3$ ) of 2-chloro-1-phenylethanol (**1a**)

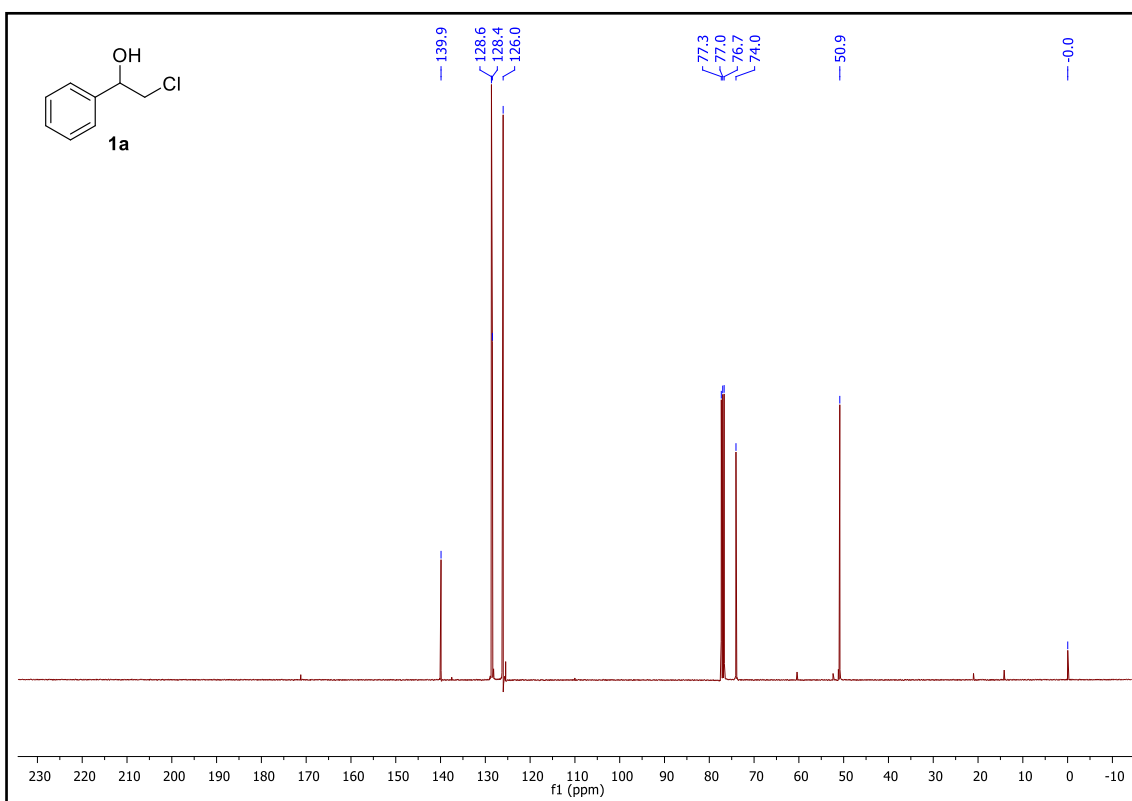

$^1\text{H}$  NMR (400 MHz,  $\text{CDCl}_3$ ) of 2-bromo-1-phenylethanol (**1b**)

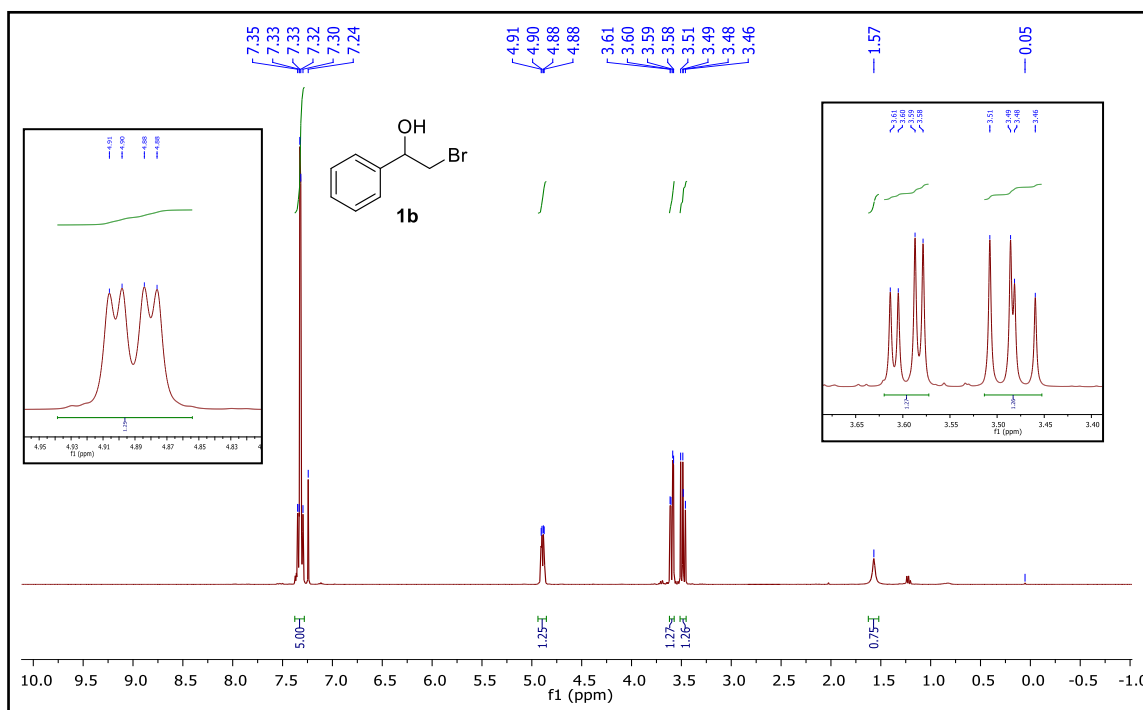

$^{13}\text{C}$  NMR (100 MHz,  $\text{CDCl}_3$ ) of 2-bromo-1-phenylethanol (**1b**)

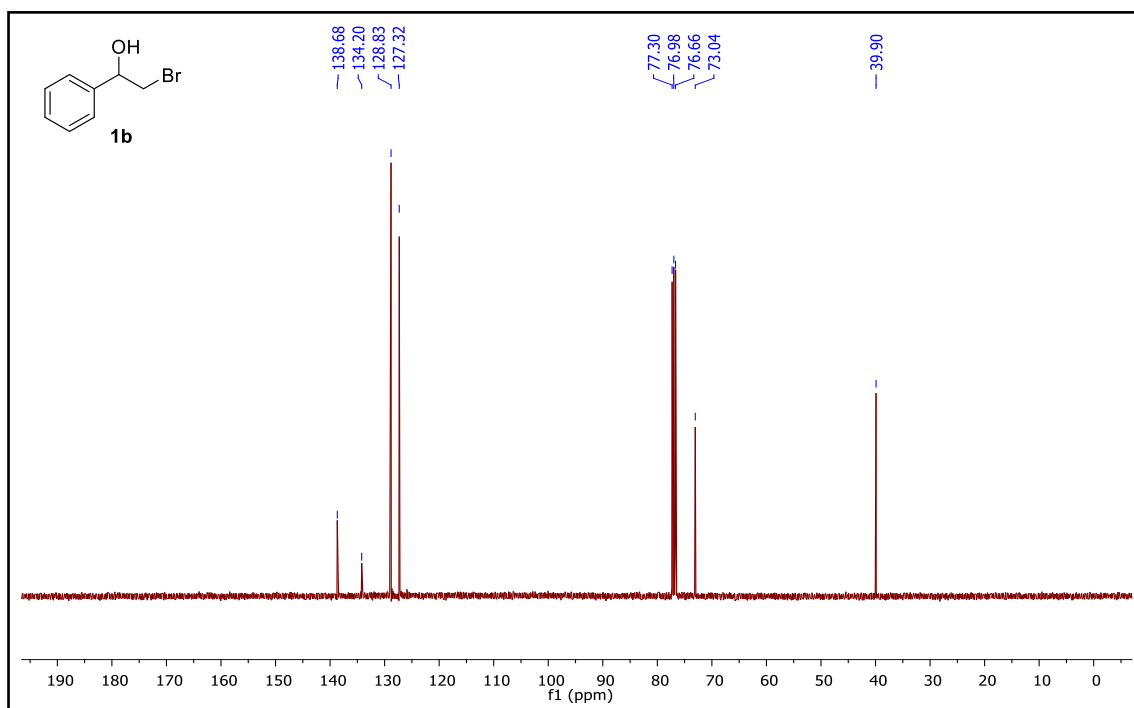

$^1\text{H}$  NMR (400 MHz,  $\text{CDCl}_3$ ) of 2-bromo-1-(4-bromophenyl)ethanol (**1c**).

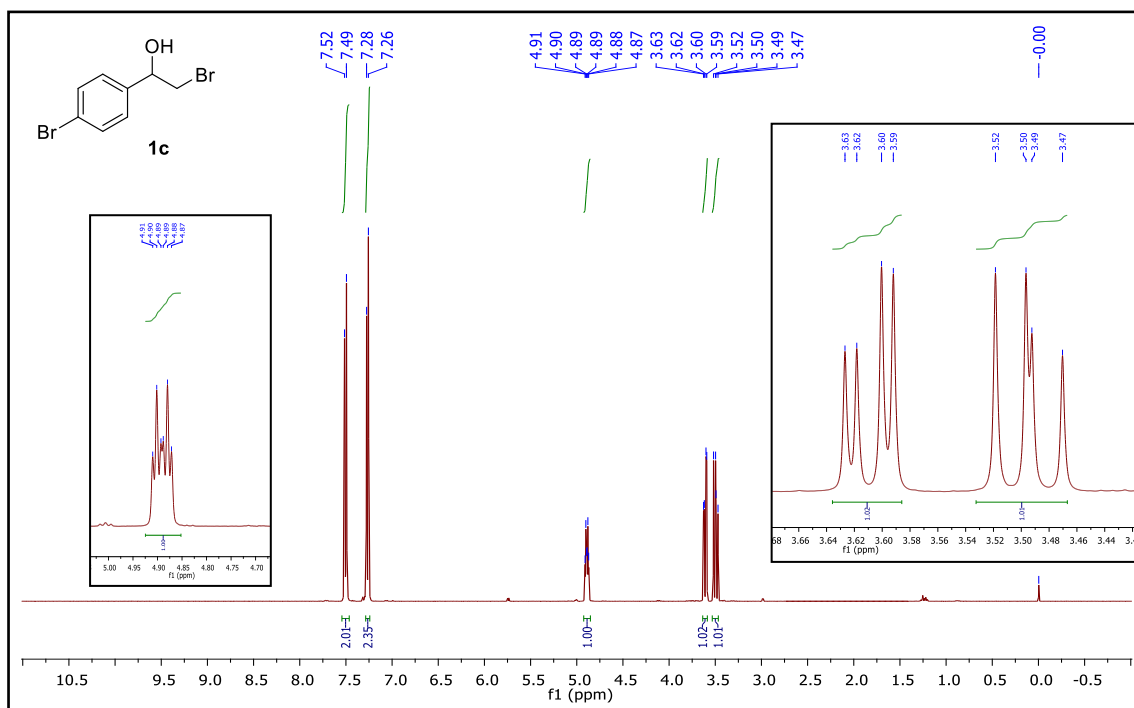

$^{13}\text{C}$  NMR (100 MHz,  $\text{CDCl}_3$ ) of 2-bromo-1-(4-bromophenyl)ethanol (**1c**).

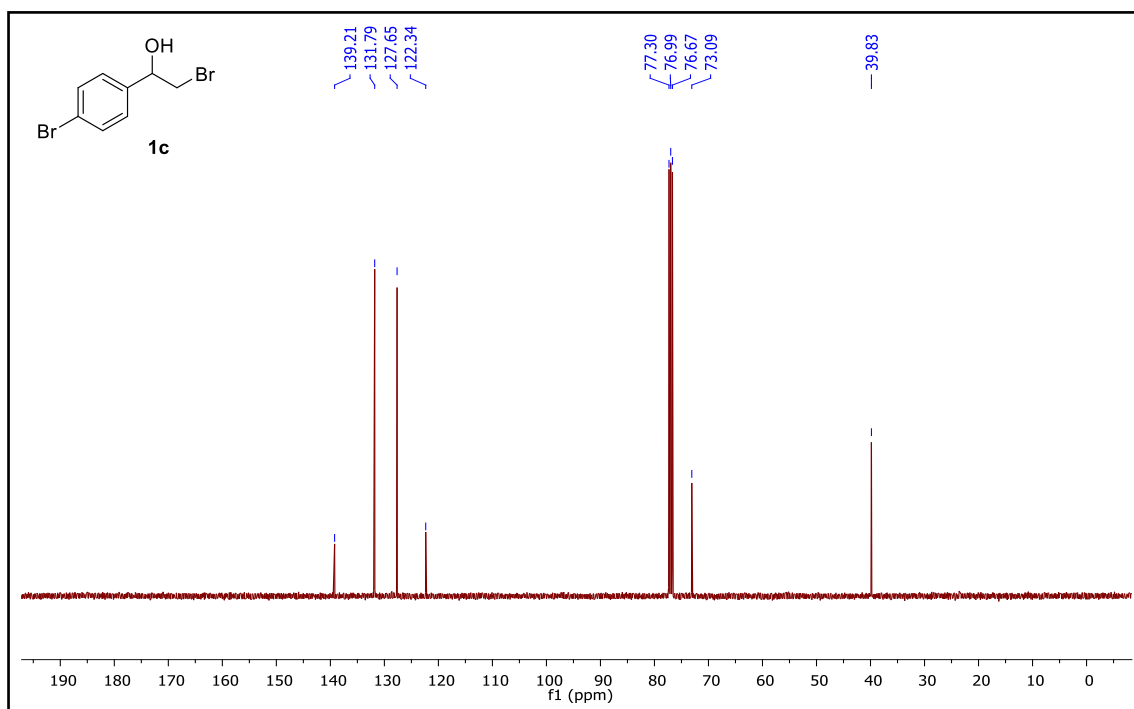

<sup>1</sup>H NMR (400 MHz, CDCl<sub>3</sub>) of 2-bromo-1-(4-chlorophenyl)ethanol (**1d**)

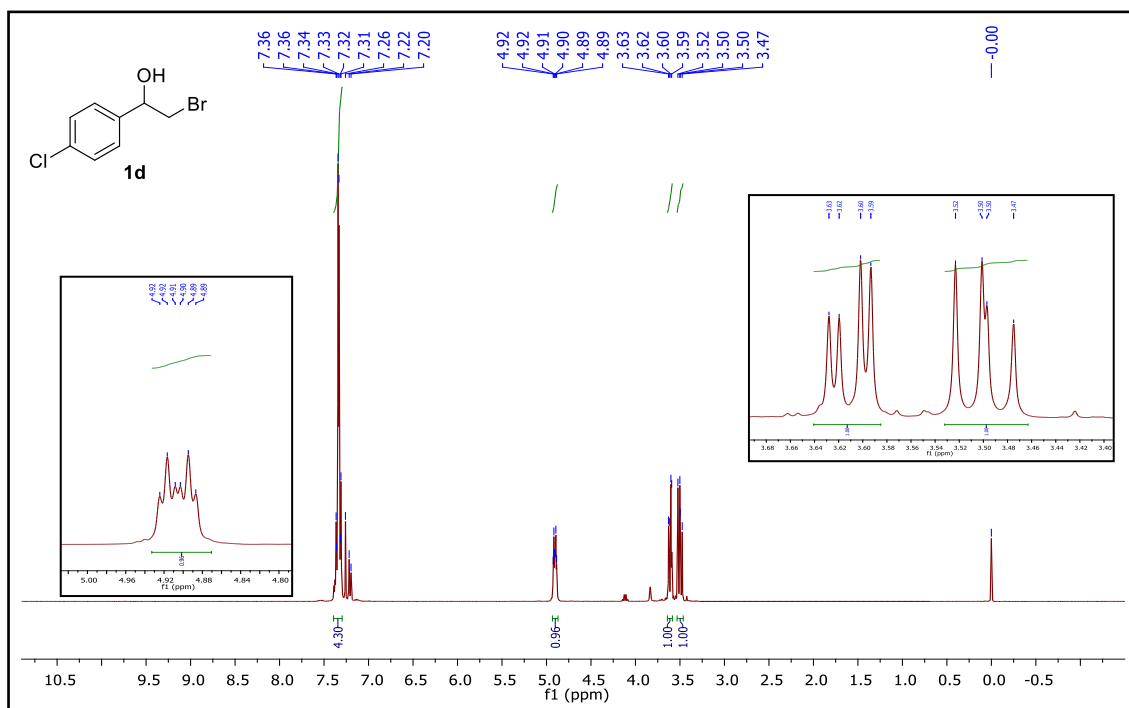

**Fig. S19.** <sup>13</sup>C NMR (100 MHz, CDCl<sub>3</sub>) of 2-bromo-1-(4-chlorophenyl)ethanol (**1d**)

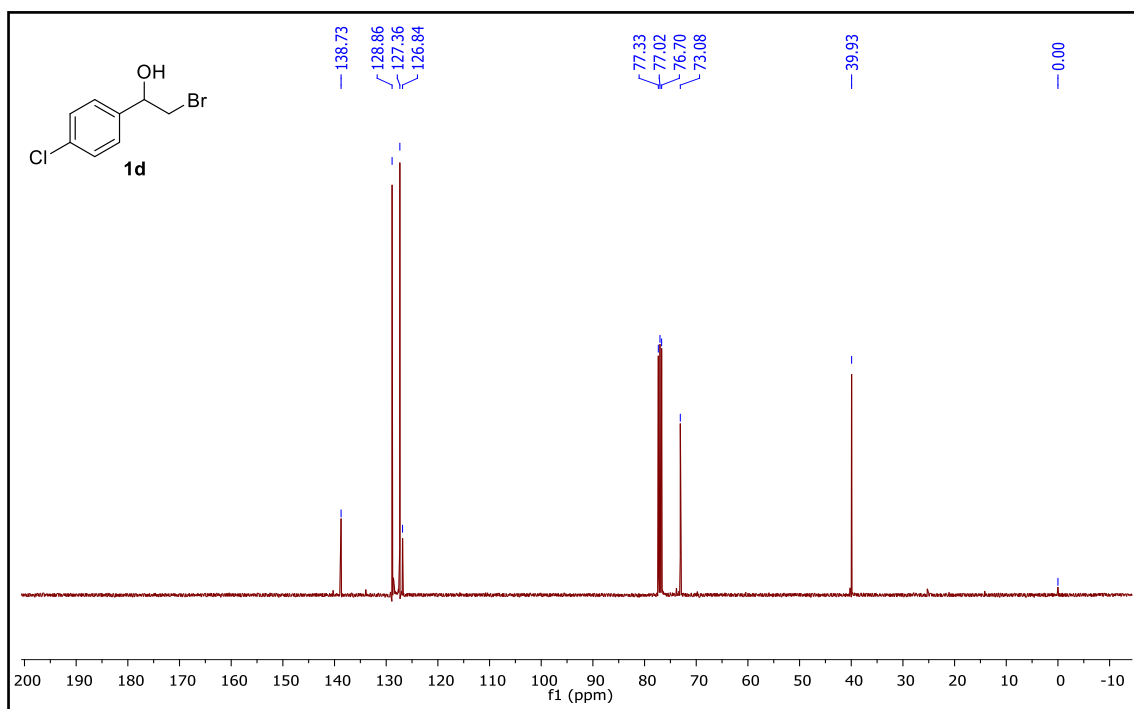

$^1\text{H}$  NMR (500 MHz,  $\text{CDCl}_3$ ) of 2-chloro-1-phenylethyl acetate (**2a**).

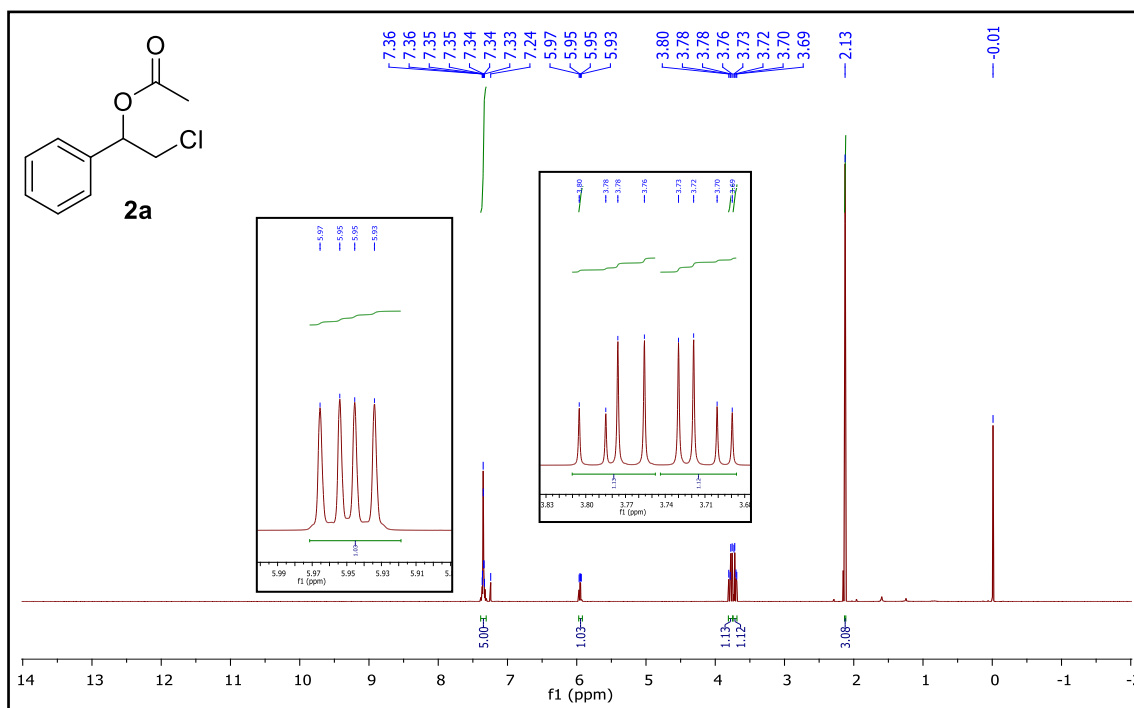

$^{13}\text{C}$  NMR (125 MHz,  $\text{CDCl}_3$ ) of 2-chloro-1-phenylethyl acetate (**2a**).

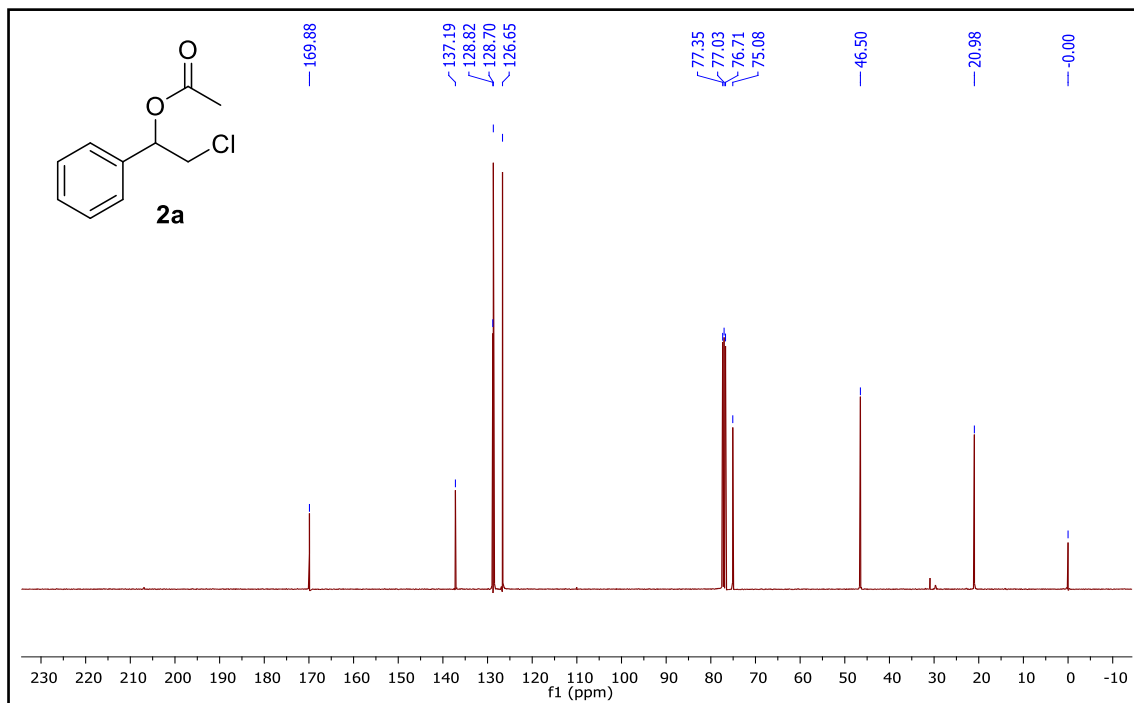

$^1\text{H}$  NMR (500 MHz,  $\text{CDCl}_3$ ) of 2-bromo-1-phenylethyl acetate (**2b**).

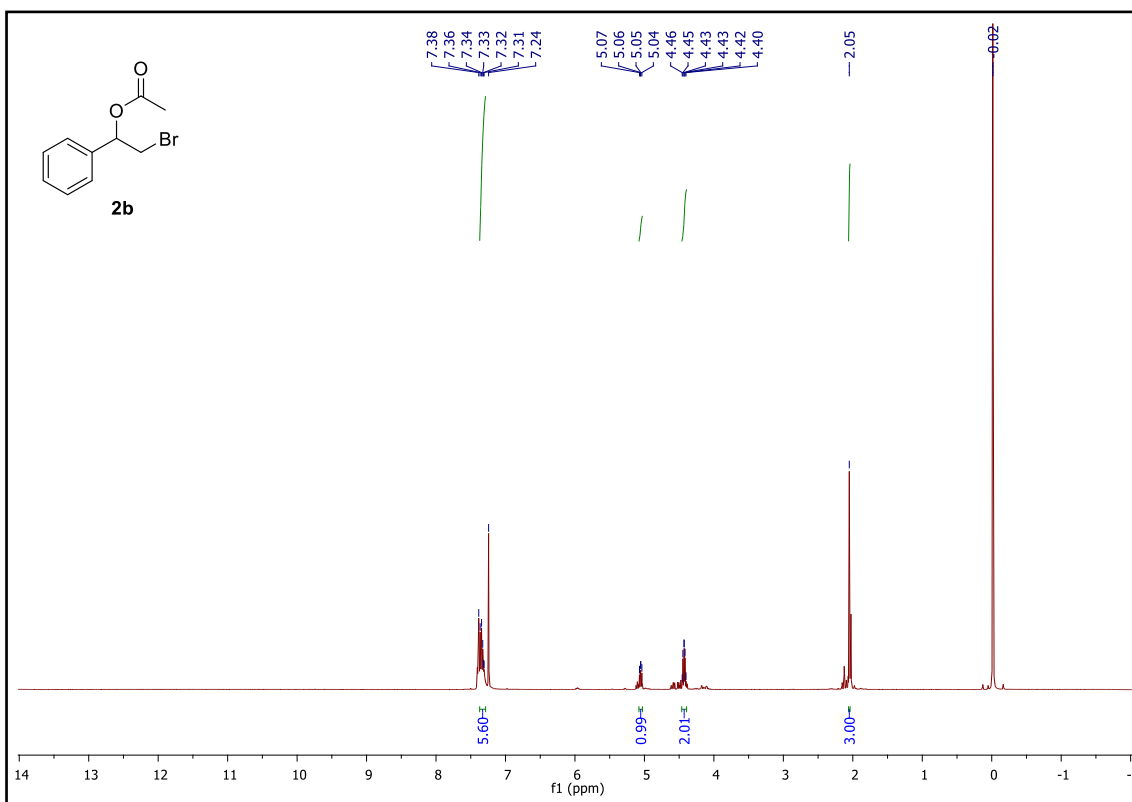

$^{13}\text{C}$  NMR (125 MHz,  $\text{CDCl}_3$ ) of 2-bromo-1-phenylethyl acetate (**2b**).

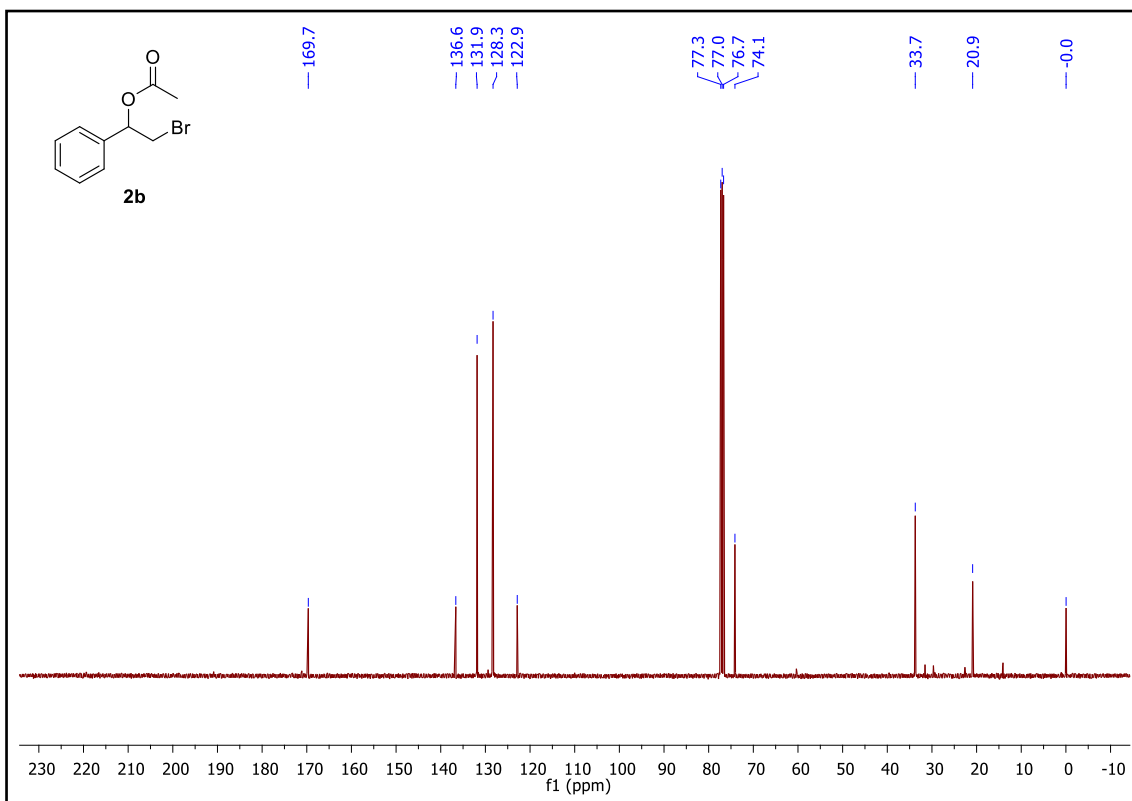

$^1\text{H}$  NMR (400 MHz,  $\text{CDCl}_3$ ) of 2-bromo-1-(4-bromophenyl)ethyl acetate (**2c**).

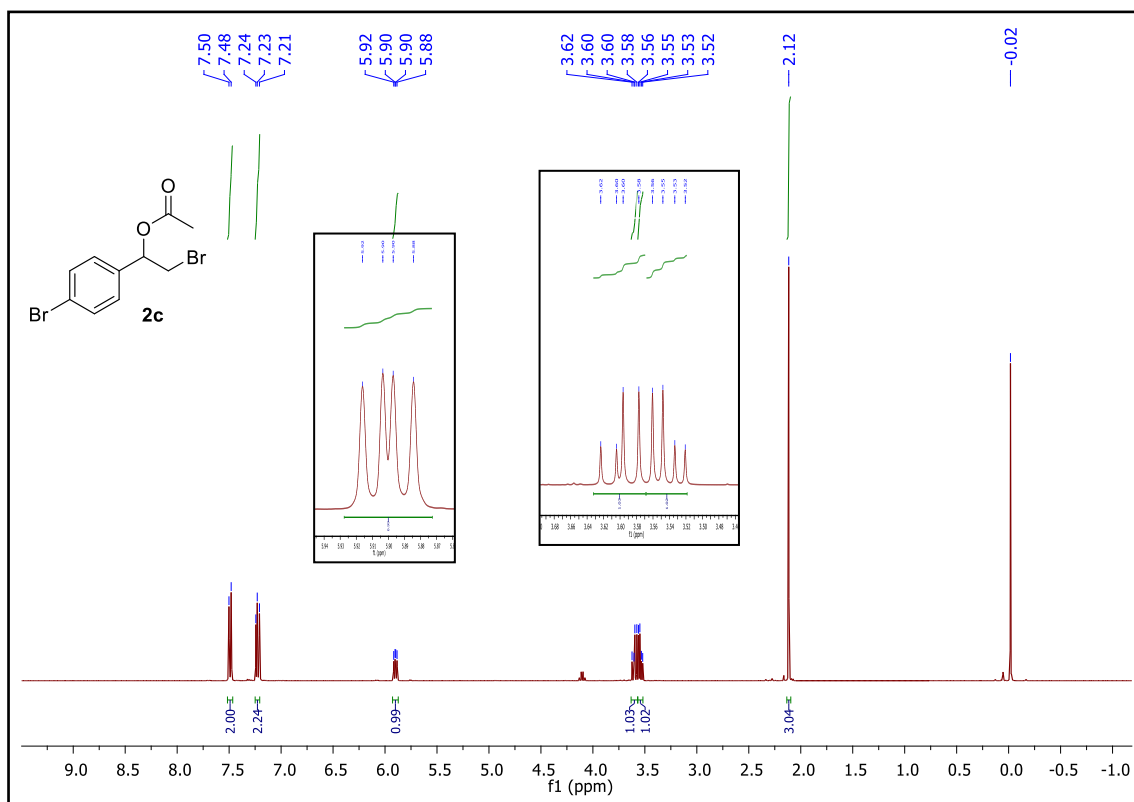

$^{13}\text{C}$  NMR (100 MHz,  $\text{CDCl}_3$ ) of 2-bromo-1-(4-bromophenyl)ethyl acetate (**2c**).

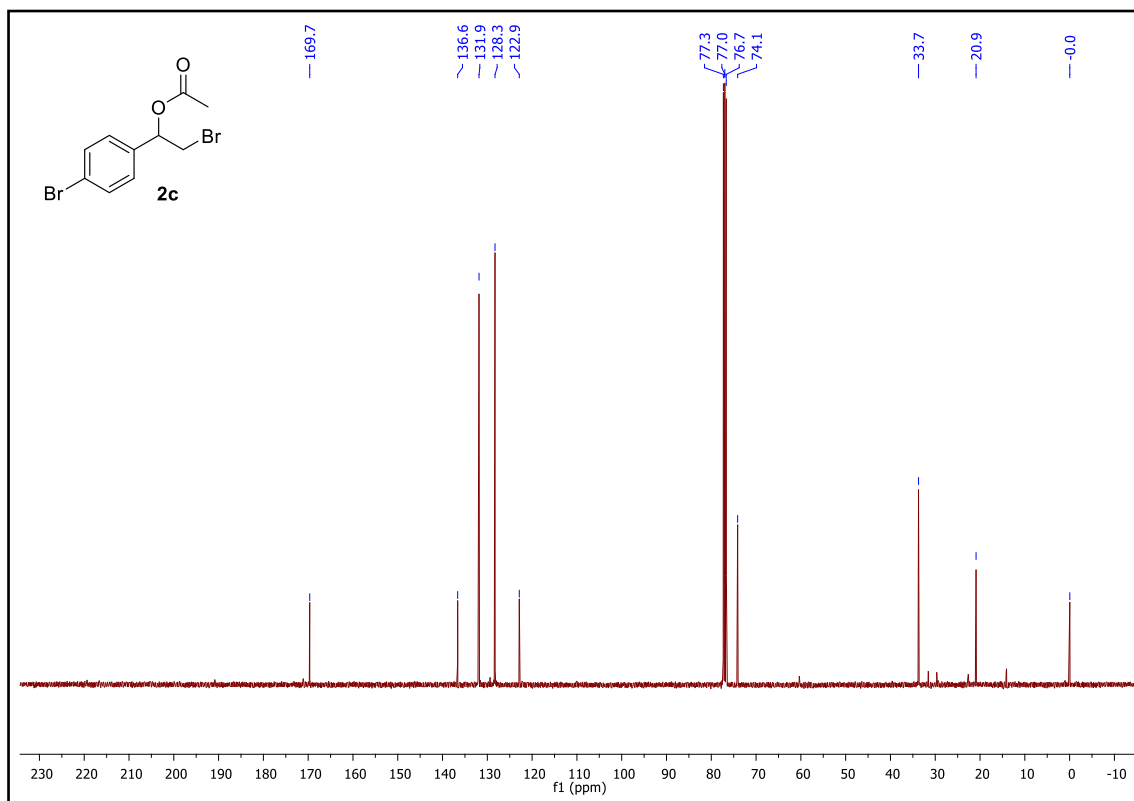

$^1\text{H}$  NMR (400 MHz,  $\text{CDCl}_3$ ) of 2-bromo-1-(4-chlorophenyl)ethyl acetate (**2d**).

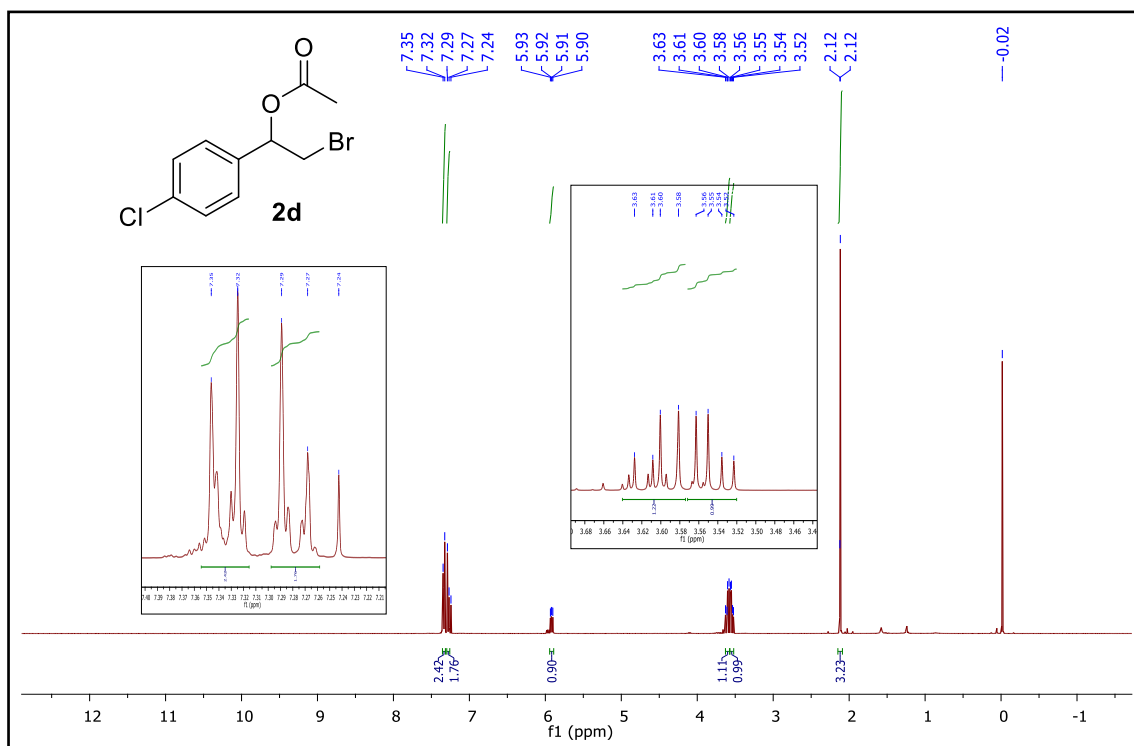

$^{13}\text{C}$  NMR (100 MHz,  $\text{CDCl}_3$ ) of 2-bromo-1-(4-chlorophenyl)ethyl acetate (**2d**).

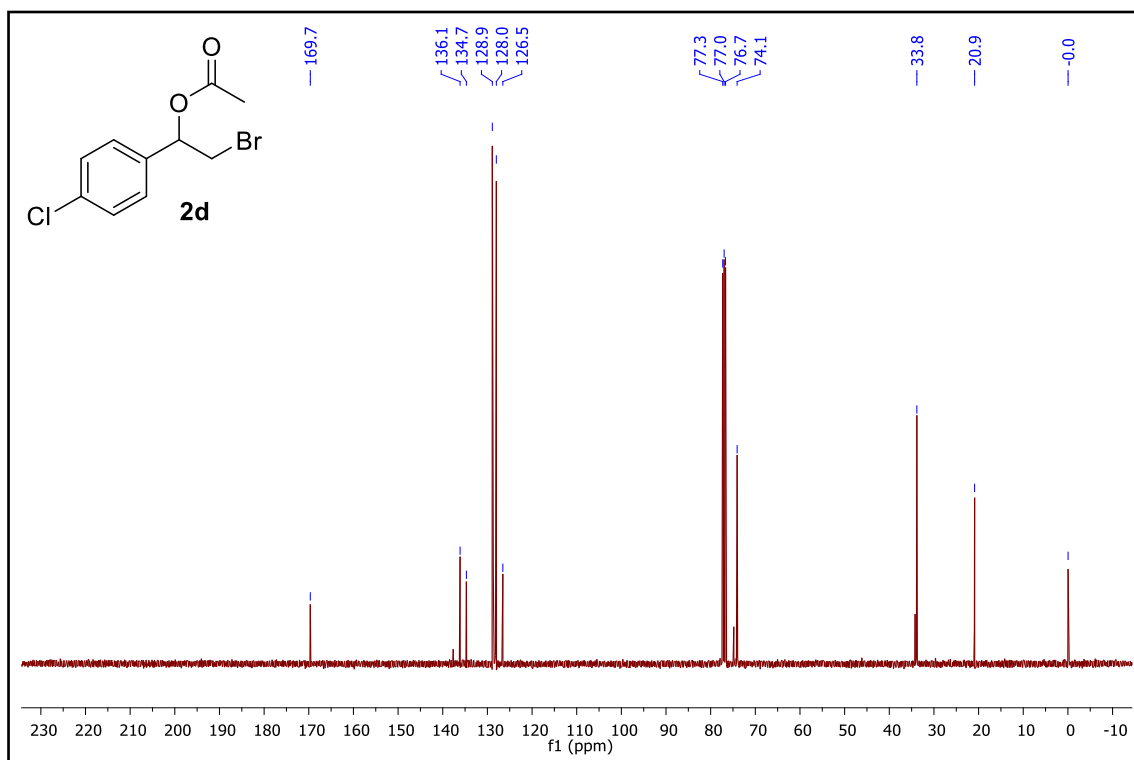



$^1\text{H}$  NMR (400 MHz,  $\text{CDCl}_3$ ) of 2-phenyloxirane (**3a**)

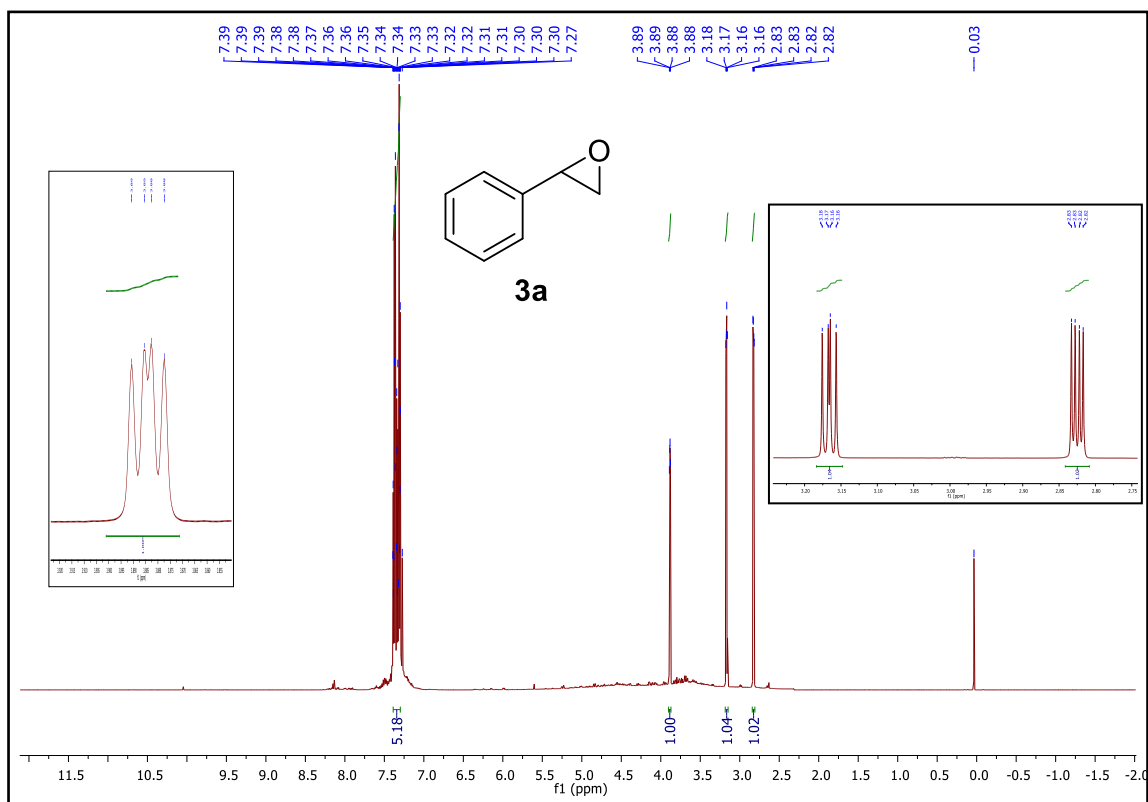

$^{13}\text{C}$  NMR (100 MHz,  $\text{CDCl}_3$ ) of 2-phenyloxirane (**3a**)

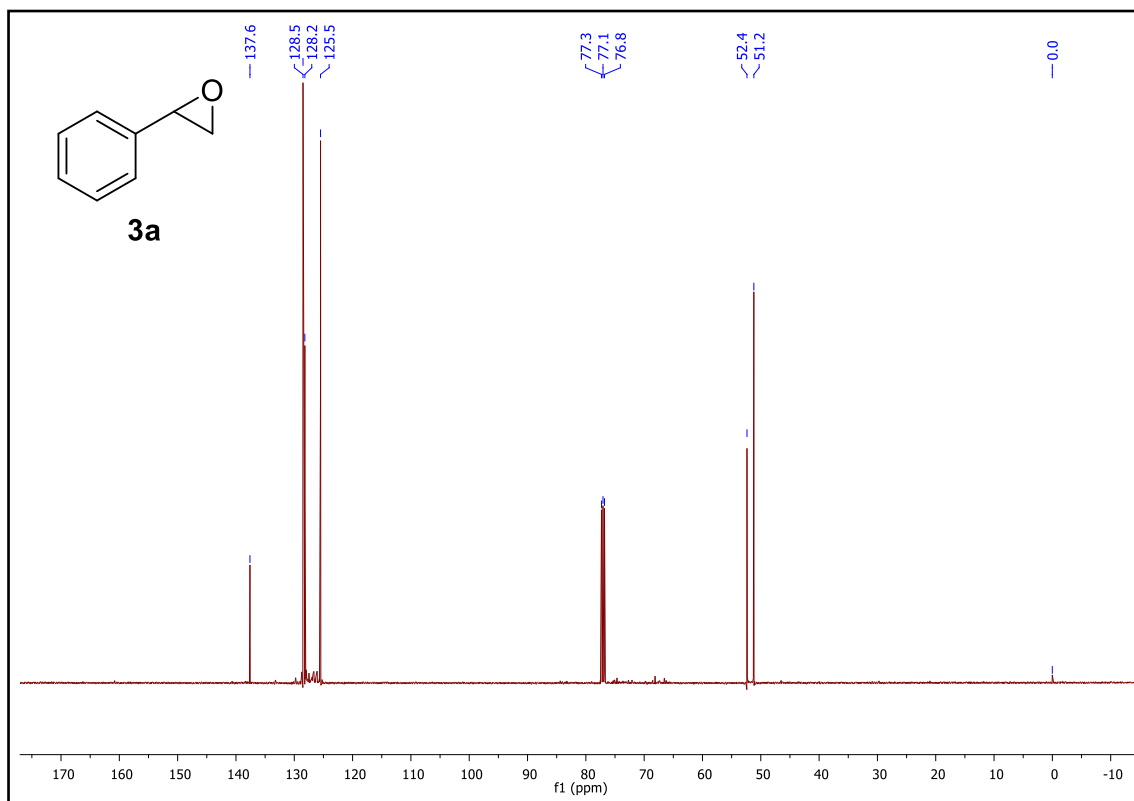

<sup>1</sup>H NMR (400 MHz, CDCl<sub>3</sub>) of 2-(4-bromophenyl)oxirane (**3b**)

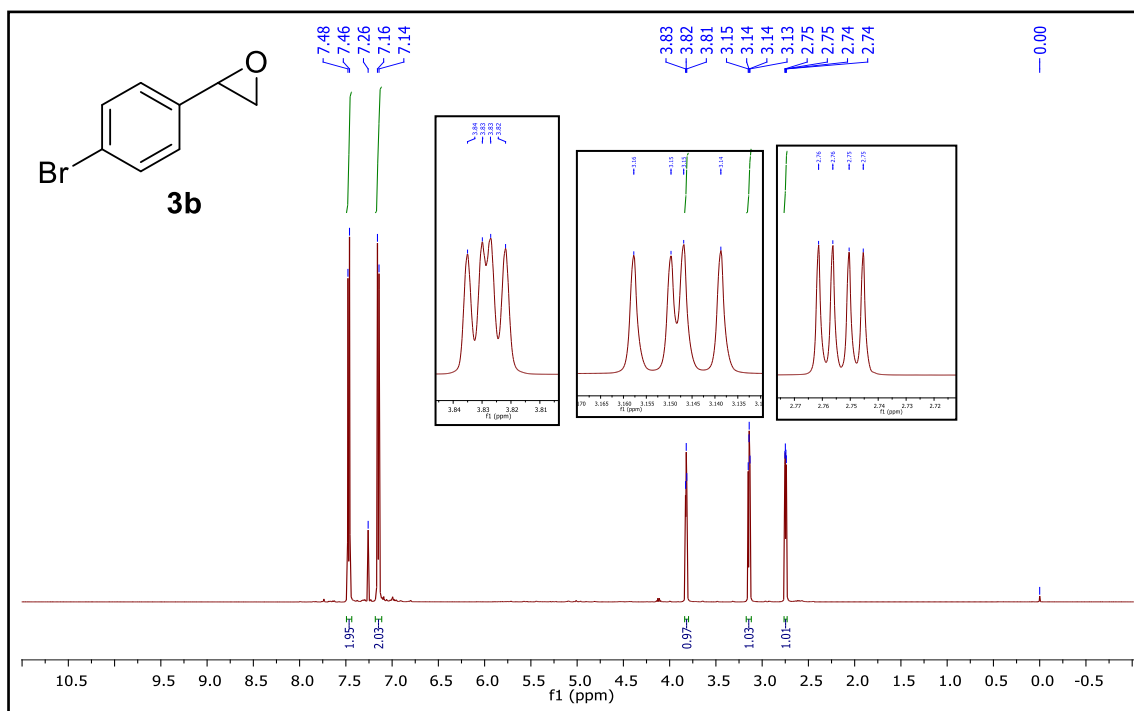

<sup>13</sup>C NMR (100 MHz, CDCl<sub>3</sub>) of 2-(4-bromophenyl)oxirane (**3b**)

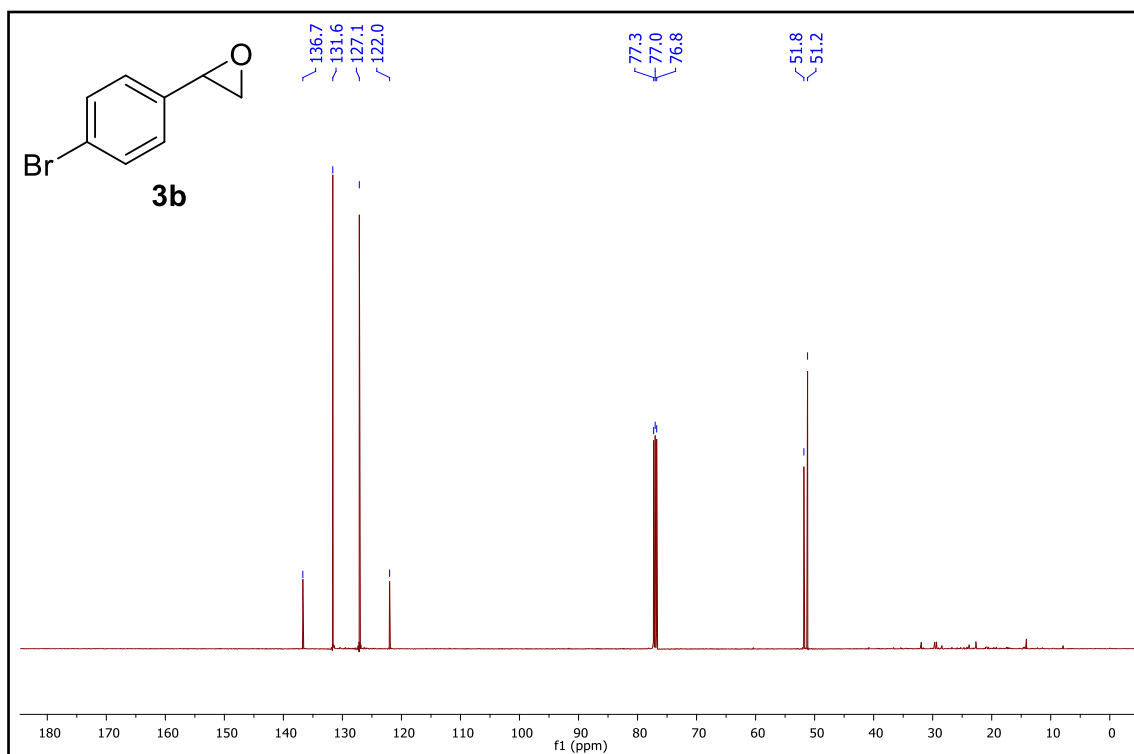

$^1\text{H}$  NMR (400 MHz,  $\text{CDCl}_3$ ) of 2-(4-chlorophenyl)oxirane (**3c**)

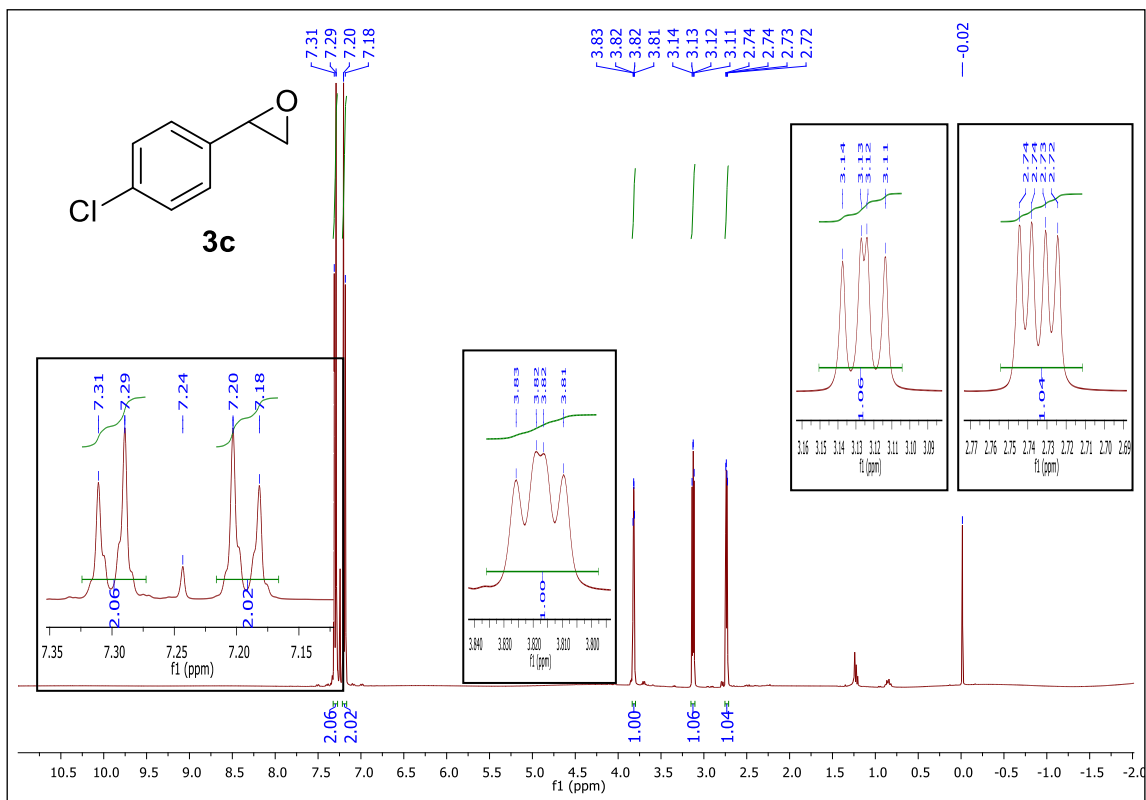

$^{13}\text{C}$  NMR (100 MHz,  $\text{CDCl}_3$ ) of 2-(4-chlorophenyl)oxirane (**3c**)

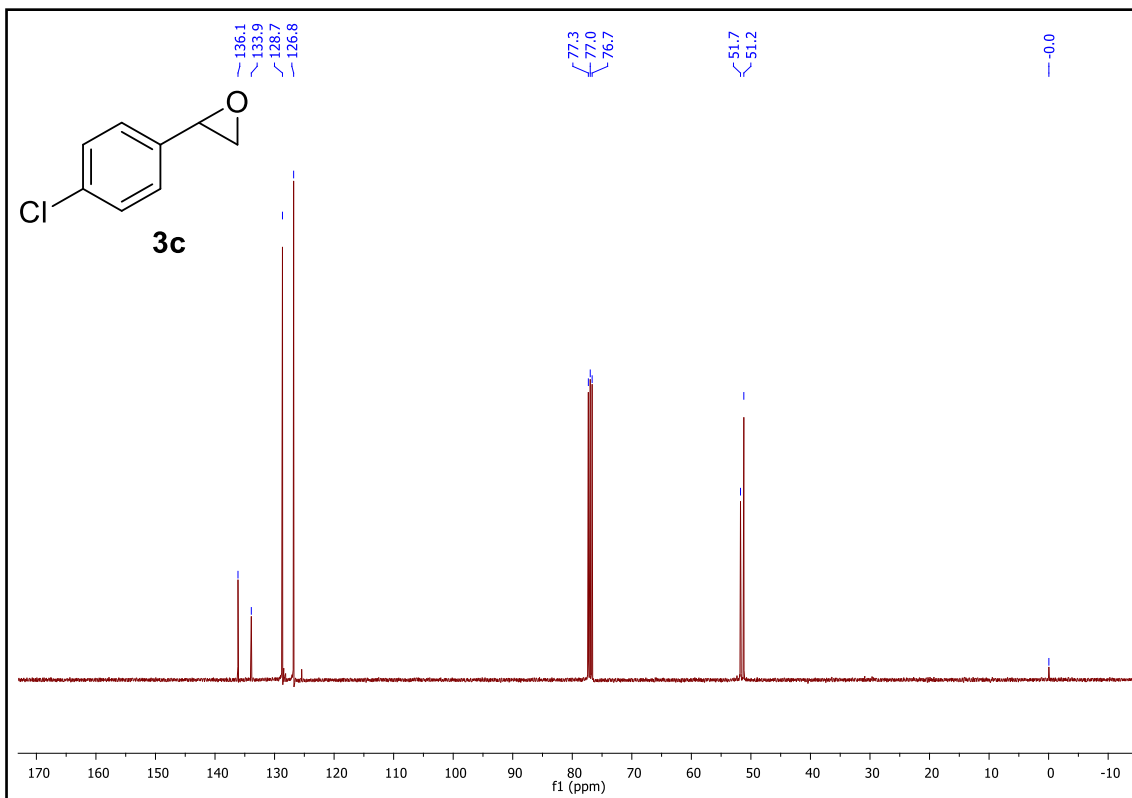

$^1\text{H}$  NMR (400 MHz,  $\text{CD}_3\text{OD}$ ) of (*S*)-1-(4-chlorophenyl)-2-(1H-1,3-triazol-1-yl)ethanol

(4)

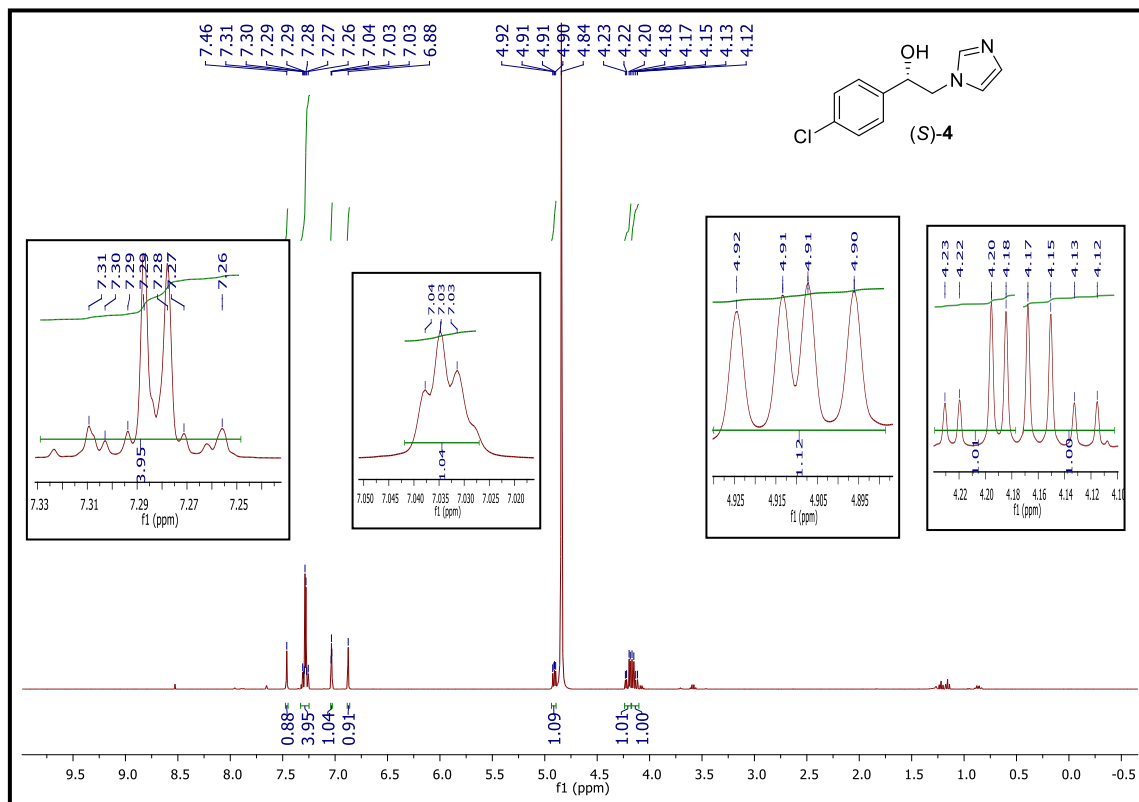

**Fig. S51.**  $^{13}\text{C}$  NMR (100 MHz,  $\text{CD}_3\text{OD}$ ) of (*S*)-1-(4-chlorophenyl)-2-(1H-1,3-triazol-1-yl)ethanol (4)

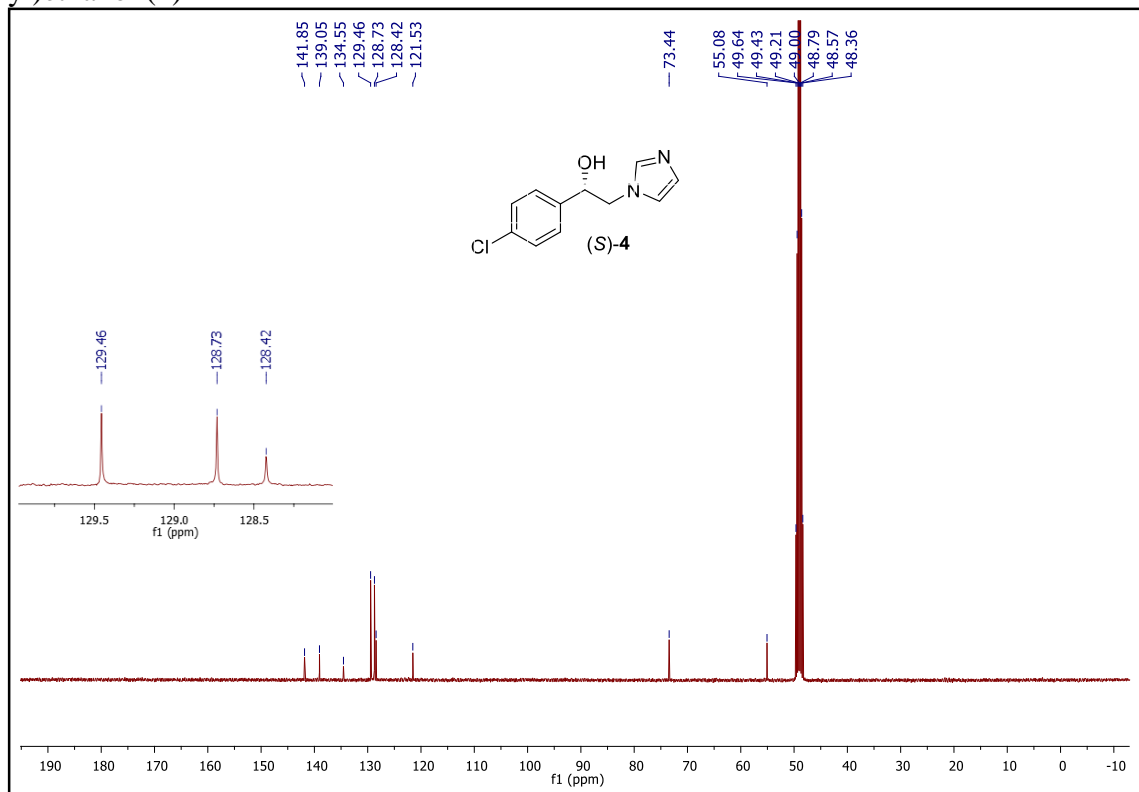

GC-FID Chromatograms: (A) Standard of (*R,S*)-2-chloro-1-phenylethanol **1a**. (B) Standard of (*R,S*)-2-chloro-1-phenylethyl acetate **2a**. (C) Kinetic resolution of (*S*)-**2a** and (*R*)-**1a** by lipase from *C. cylindracea* (D) *R. niveus* (E) *A. niger* (F) *P. fluorescens* after 24 h of reaction on 32 °C, 130 rpm.

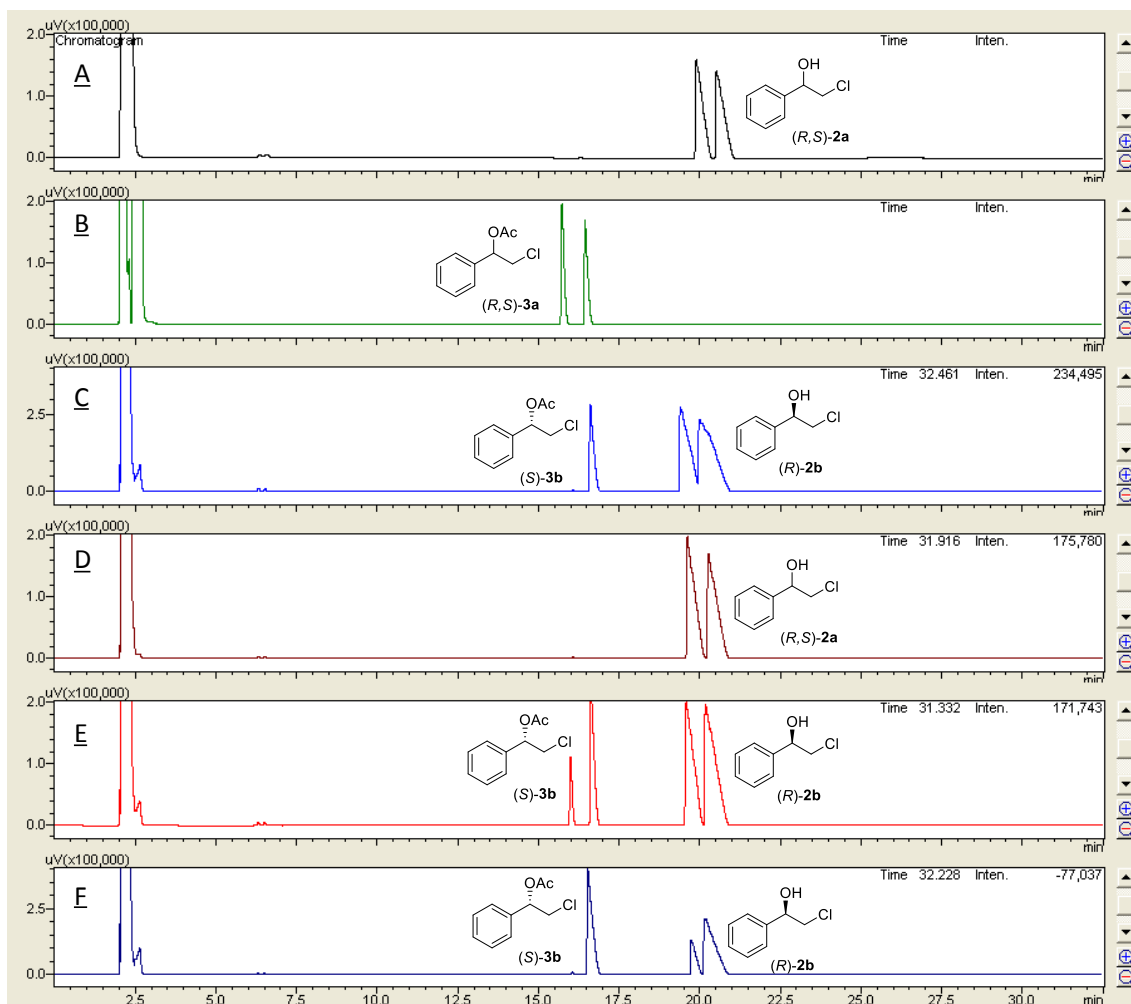

GC-FID Chromatograms: Kinetic resolution of (*S*)-**2b** and (*R*)-**1b** by lipase from (A) *P. fluorescens* (B) *C. cylindracea* (C) *R. niveus* (D) *A. niger* after 24 h of reaction on 32 °C, 130 rpm. (F) Standard of (*R,S*)-2-chloro-1-phenylethanol **1b**

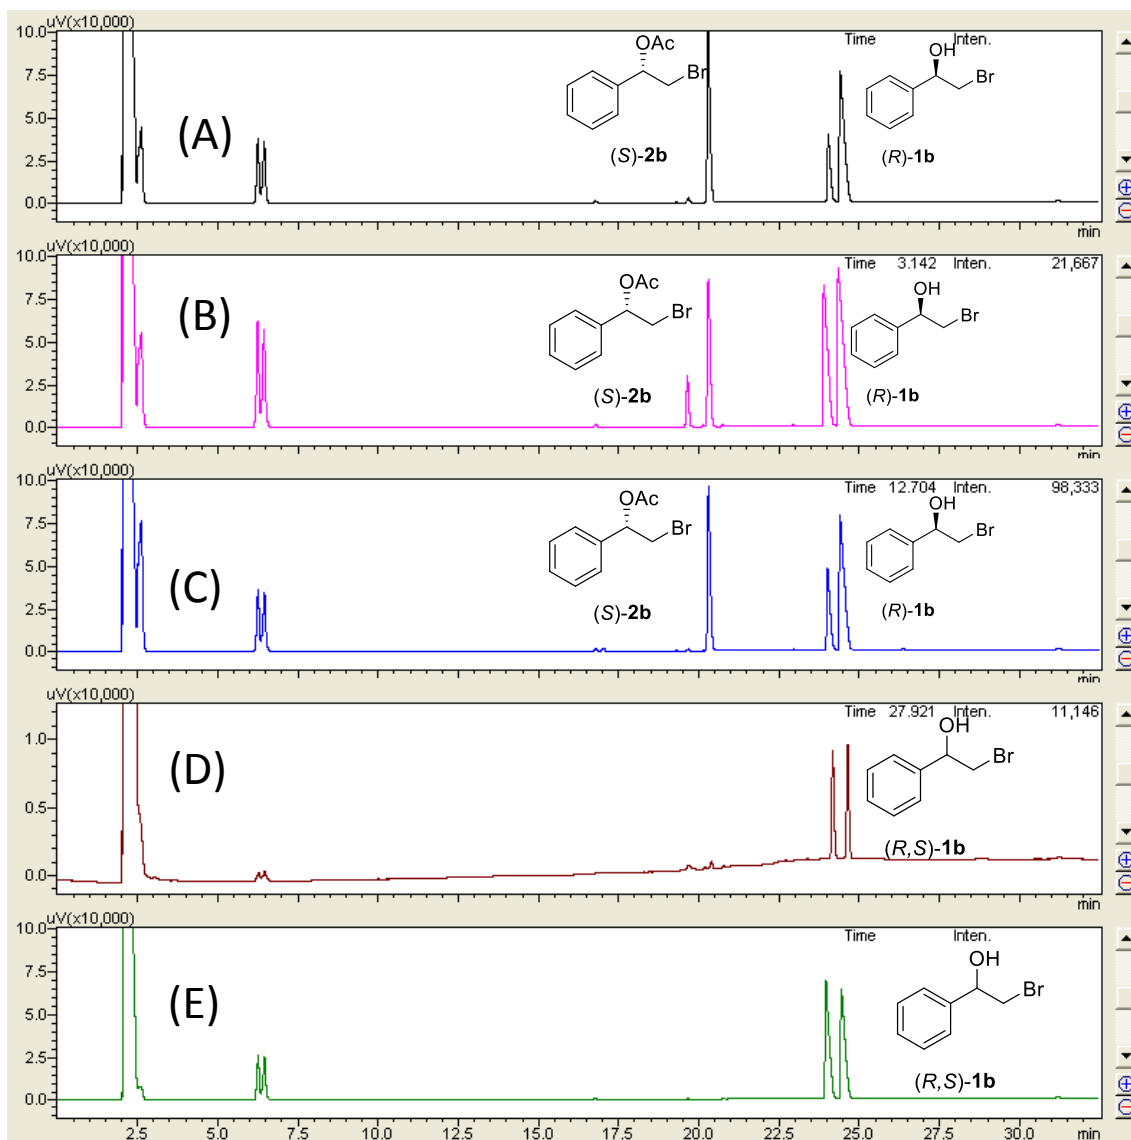

GC-FID Chromatograms: Kinetic resolution of (*R,S*)-**2a** by FS-*LPf* in different concentrations (a) 50 mg (24h, 32°C, 130 rpm); (b) 150 mg (24h, 32°C, 130 rpm); (c) 100 mg (48h, 32°C, 130 rpm).

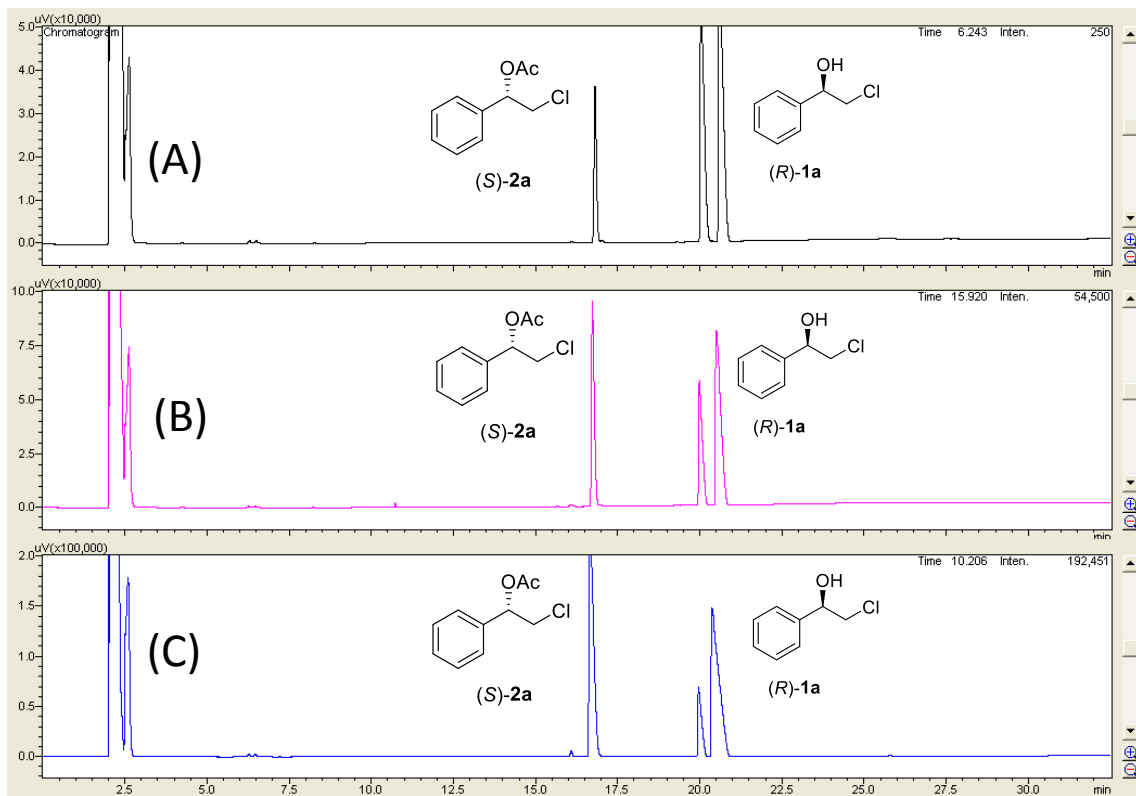

GC-FID Chromatograms: (A) Standard of (*R,S*)-**1c**. (B) Standard of acetate (*R,S*)-**2c**. (C) Kinetic resolution of (*S*)-**2c** and (*R*)-**1c** by FS-LPF after 24 h of reaction (32 °C, 130 rpm).

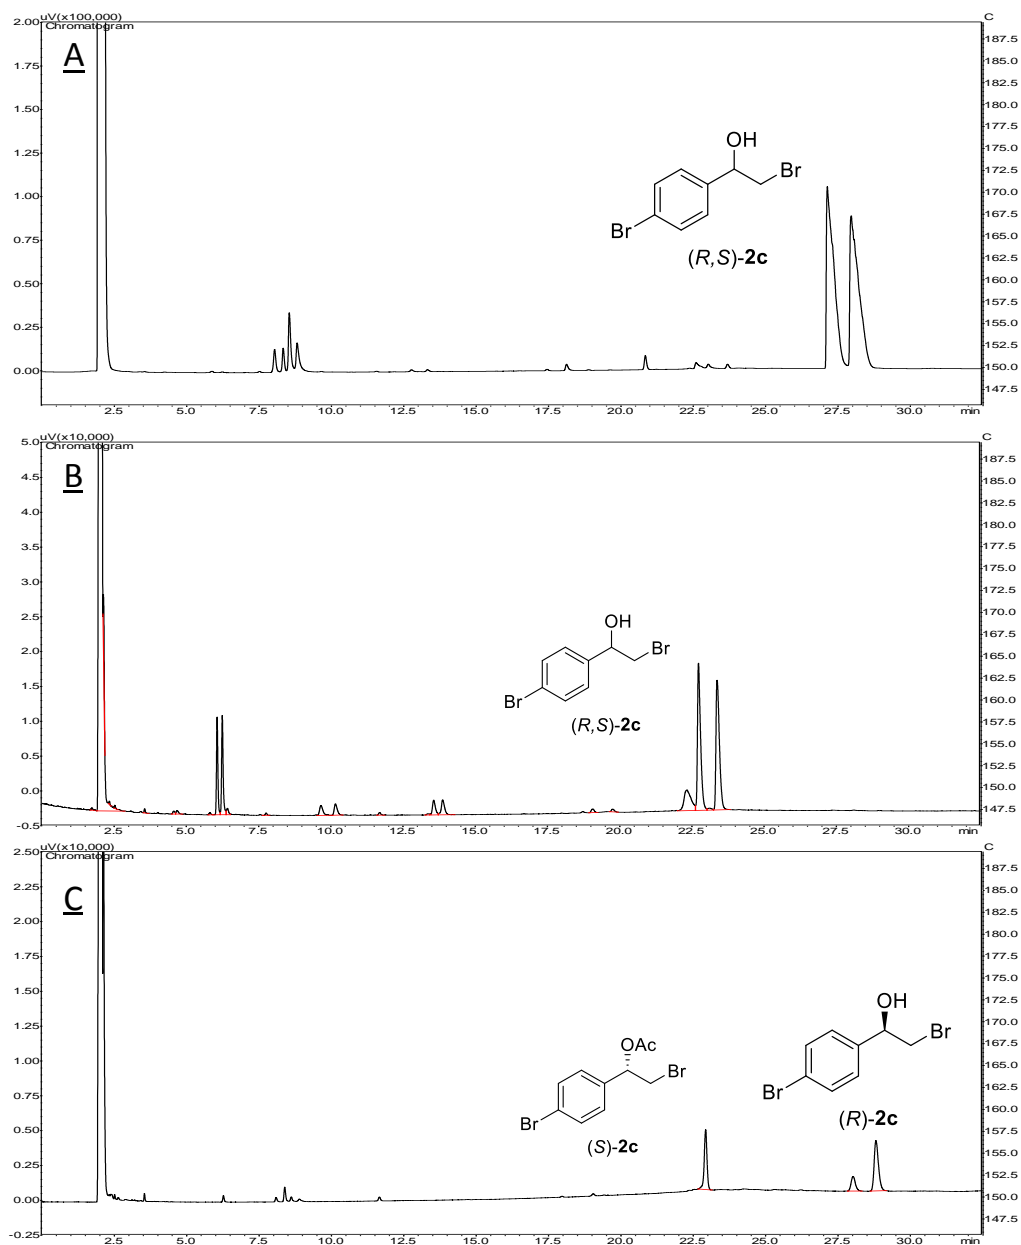



GC-FID Chromatograms: Epoxide (*S*)-**3a**.

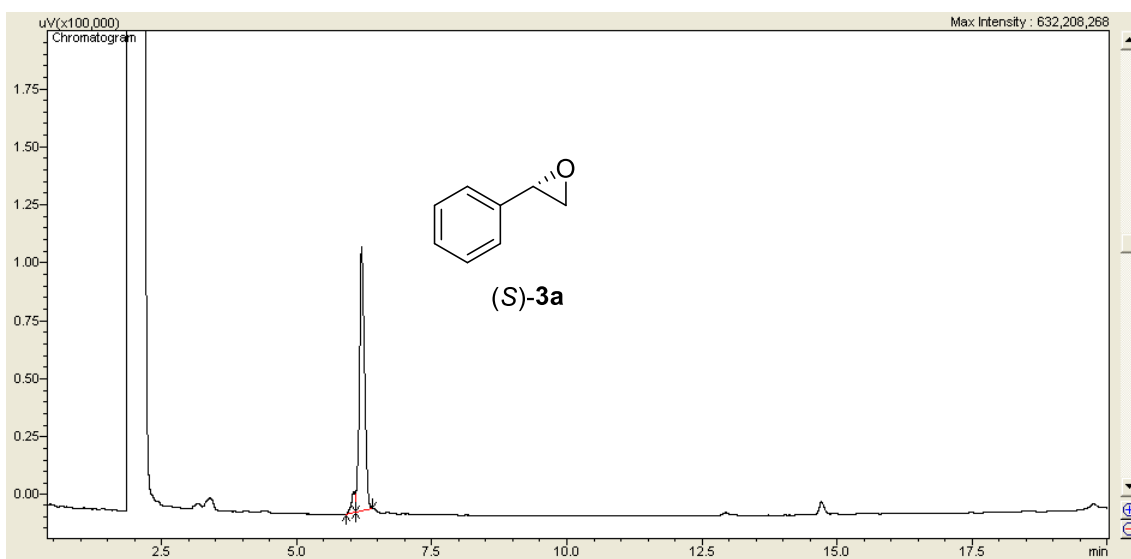

GC-FID Chromatograms: Epoxide (*S*)-**3b**.

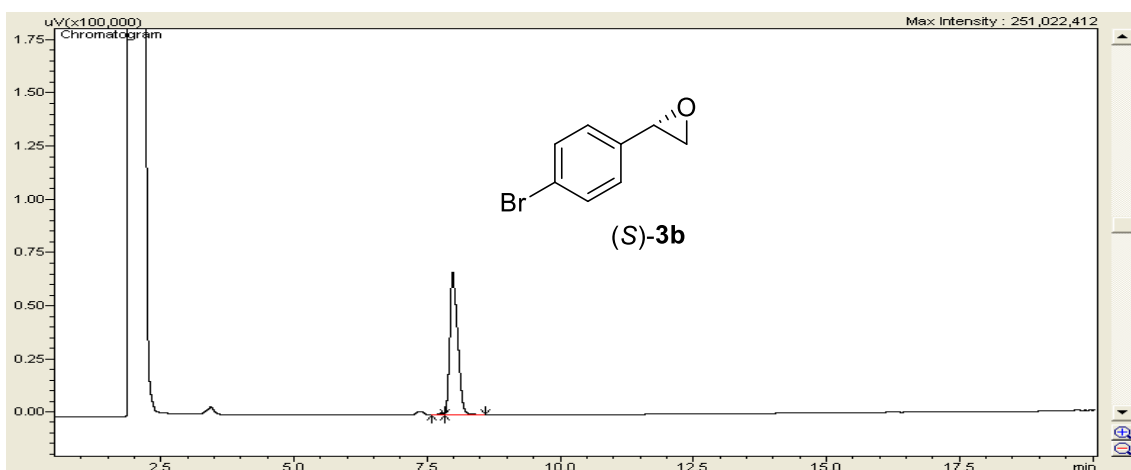

GC-FID Chromatograms: (A) Standard of (*R,S*)-**3c**.

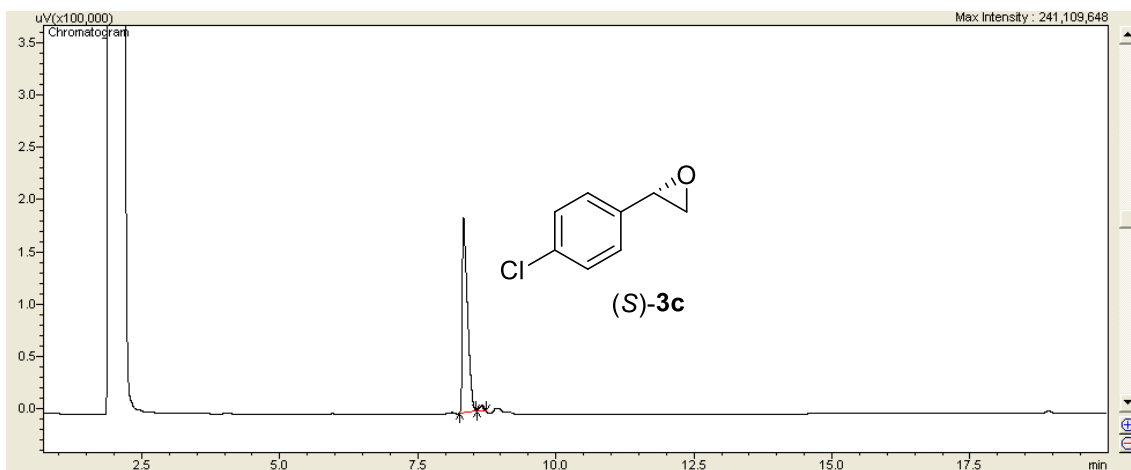

## References

1. Lin, H.; Chen, Y.; Xu, X.; Xiaa, S. *J. Mol. Catal. B: Enzym.* 2009, **57**, 1.
2. Yang, W.; Xu, J.; Xie, Y.; Xu, Y.; Zhao, G.; Lin, G. *Tetrahedron-Asymmetry* 2006, **17**, 1769.
3. Hiratake, J.; Inagaki, M.; Nishioka, T.; Oda, J. *Org. Chem.* 1998, **53**, 6130.
4. Traff, A.; Bogar, K.; Warner, M.; Backvall, J. *Org. Lett.* 2008, **10**, 4807.
5. Basavaiah, D.; Reddy, G.; Chandrashekar, V. *Tetrahedron: Asymmetry*, 2011, **12**, 685.
6. Toda, H.; Imae, R.; Itoh, N. *Tetrahedron: Asymmetry*, 2012, **23**, 1542.
7. Basavaiah, D.; Das, U.; Roy, S. *J. Chem. Scien.*, 2009, **121**, 1003.
8. Zhang, J.; Wang, J.; Qiu, Z.; Wang, Y. *Tetrahedron*, 2011, **67**, 6859.
9. Roman, G.; Vlahaskis, J. Z.; Vukomanovic, D.; Nakatsu, K.; Szarek, W. A. *ChemMedChem*, 2010, **5**, 1541.
